# Supplementary material for: Prospective evaluation of improving fluoroquinolone exposure using centralised therapeutic drug monitoring (TDM) in patients with tuberculosis (PERFECT): a study protocol of a prospective multicentre cohort study
Source: PubMed Central journal article supplement — BMJ Open. 2020 Jun 16;10(6):e035350. doi: 10.1136/bmjopen-2019-035350 (PMC7304807; doi:10.1136/bmjopen-2019-035350), 2020-06-16
Supplement: bmjopen-2019-035350.draft_revisions.pdf [file bmjopen-2019-035350.draft_revisions.pdf]

# BMJ Open

BMJ Open is committed to open peer review. As part of this commitment we make the peer review history of every article we publish publicly available.

When an article is published we post the peer reviewers' comments and the authors' responses online. We also post the versions of the paper that were used during peer review. These are the versions that the peer review comments apply to.

The versions of the paper that follow are the versions that were submitted during the peer review process. They are not the versions of record or the final published versions. They should not be cited or distributed as the published version of this manuscript.

BMJ Open is an open access journal and the full, final, typeset and author-corrected version of record of the manuscript is available on our site with no access controls, subscription charges or pay-per-view fees (<http://bmjopen.bmj.com>).

If you have any questions on BMJ Open's open peer review process please email [info.bmjopen@bmj.com](mailto:info.bmjopen@bmj.com)

# BMJ Open

## Prospective Evaluation of improving Fluoroquinolone Exposure using Centralized TDM in patients with Tuberculosis (PERFECT) – a study protocol of a prospective multicentre cohort study.

|                               |                                                                                                                                                                                                                                                                                                                                                                                                                                                                                                                                                                                                                                                                                                                                                                                                                                                                                                                                                                                                                                                                                                                                                                                                                                                                                                                                                                                                                                                                                                                                                                                                                                                                                                                                                                                                                                                                                                                                                                                                                                                                                                                                                                                                                               |
|-------------------------------|-------------------------------------------------------------------------------------------------------------------------------------------------------------------------------------------------------------------------------------------------------------------------------------------------------------------------------------------------------------------------------------------------------------------------------------------------------------------------------------------------------------------------------------------------------------------------------------------------------------------------------------------------------------------------------------------------------------------------------------------------------------------------------------------------------------------------------------------------------------------------------------------------------------------------------------------------------------------------------------------------------------------------------------------------------------------------------------------------------------------------------------------------------------------------------------------------------------------------------------------------------------------------------------------------------------------------------------------------------------------------------------------------------------------------------------------------------------------------------------------------------------------------------------------------------------------------------------------------------------------------------------------------------------------------------------------------------------------------------------------------------------------------------------------------------------------------------------------------------------------------------------------------------------------------------------------------------------------------------------------------------------------------------------------------------------------------------------------------------------------------------------------------------------------------------------------------------------------------------|
| Journal:                      | <i>BMJ Open</i>                                                                                                                                                                                                                                                                                                                                                                                                                                                                                                                                                                                                                                                                                                                                                                                                                                                                                                                                                                                                                                                                                                                                                                                                                                                                                                                                                                                                                                                                                                                                                                                                                                                                                                                                                                                                                                                                                                                                                                                                                                                                                                                                                                                                               |
| Manuscript ID                 | bmjopen-2019-035350                                                                                                                                                                                                                                                                                                                                                                                                                                                                                                                                                                                                                                                                                                                                                                                                                                                                                                                                                                                                                                                                                                                                                                                                                                                                                                                                                                                                                                                                                                                                                                                                                                                                                                                                                                                                                                                                                                                                                                                                                                                                                                                                                                                                           |
| Article Type:                 | Protocol                                                                                                                                                                                                                                                                                                                                                                                                                                                                                                                                                                                                                                                                                                                                                                                                                                                                                                                                                                                                                                                                                                                                                                                                                                                                                                                                                                                                                                                                                                                                                                                                                                                                                                                                                                                                                                                                                                                                                                                                                                                                                                                                                                                                                      |
| Date Submitted by the Author: | 29-Oct-2019                                                                                                                                                                                                                                                                                                                                                                                                                                                                                                                                                                                                                                                                                                                                                                                                                                                                                                                                                                                                                                                                                                                                                                                                                                                                                                                                                                                                                                                                                                                                                                                                                                                                                                                                                                                                                                                                                                                                                                                                                                                                                                                                                                                                                   |
| Complete List of Authors:     | <p>van den Elsen, Simone; University of Groningen, University Medical Center Groningen, Clinical Pharmacy and Pharmacology<br/> Sturkenboom, Marieke; University of Groningen, University Medical Center Groningen, Clinical Pharmacy and Pharmacology<br/> Akkerman, Onno; University of Groningen, University Medical Center Groningen, Department of Pulmonary Diseases &amp; Tuberculosis; University of Groningen, University Medical Center Groningen, Tuberculosis Center Beatrixoord<br/> Barkane, Linda; Riga East University Hospital TB and Lung Disease Clinic, MDR-TB department<br/> Bruchfeld, Judith; Karolinska Institutet, Division of Infectious Diseases, Department of Medicine, Solna; Karolinska University Hospital, Department of Infectious Diseases<br/> Eather, Geoffrey; Princess Alexandra Hospital, Department of Respiratory Medicine &amp; Metro South Clinical Tuberculosis Service<br/> Heysell, Scott; University of Virginia, Division of Infectious Diseases and International Health<br/> Hurevich, Henadz; The Republican Scientific and Practical Center for Pulmonology and Tuberculosis<br/> Kuksa, Liga; Riga East University Hospital TB and Lung Disease Clinic, MDR-TB department<br/> Kunst, Heinke; Barts Health NHS Trust, Blizard Institute, Queen Mary University of London, Department of Respiratory Medicine<br/> Kuhlin, Johanna; Karolinska Institutet, Department of Medicine, Unit of Infectious Disease; Karolinska University Hospital, Department of Infectious Diseases<br/> Manika, Katerina; Aristotle University of Thessaloniki, G. Papanikolaou Hospital, Pulmonary Department, Respiratory Infections Unit<br/> Moschos, Charalampos; "Sotiria" Hospital for Chest Diseases, Drug-Resistant Tuberculosis Unit<br/> Mpagama, Stella; Kibong'oto Infectious Diseases Hospital<br/> Muñoz Torrico, Marcela; Instituto Nacional de Enfermedades Respiratorias, Clínica de Tuberculosis<br/> Skrahina, Alena; The Republican Scientific and Practical Center for Pulmonology and Tuberculosis<br/> Sotgiu, Giovanni; University of Sassari, Clinical Epidemiology and Medical Statistics Unit, Department of Medical, Surgical and Experimental Sciences,</p> |

|           |                                                                                                                                                                                                                                                                                                                                                                                                                                                                                                                                                                                                                                                                                                                                                                                                                                                                                                                                                                                                                                                                                                                                                                                                                                                                                                                                                                                                                                                       |
|-----------|-------------------------------------------------------------------------------------------------------------------------------------------------------------------------------------------------------------------------------------------------------------------------------------------------------------------------------------------------------------------------------------------------------------------------------------------------------------------------------------------------------------------------------------------------------------------------------------------------------------------------------------------------------------------------------------------------------------------------------------------------------------------------------------------------------------------------------------------------------------------------------------------------------------------------------------------------------------------------------------------------------------------------------------------------------------------------------------------------------------------------------------------------------------------------------------------------------------------------------------------------------------------------------------------------------------------------------------------------------------------------------------------------------------------------------------------------------|
|           | <p>Tadolini, Marina; Alma Mater Studiorum University of Bologna, Unit of Infectious Diseases, Department of Medical and Surgical Sciences</p> <p>Tiberi, Simon; Barts Health NHS Trust, Blizard Institute, Queen Mary University of London, Department of Infection</p> <p>Volpato, Francesca; Alma Mater Studiorum University of Bologna, Unit of Infectious Diseases, Department of Medical and Surgical Sciences</p> <p>van der Werf, Tjip S.; University Medical Center Groningen, Department of Pulmonary Diseases &amp; Tuberculosis; University of Groningen, University Medical Center Groningen, Department of Internal Medicine</p> <p>Wilson, Malcolm; Princess Alexandra Hospital, Department of Respiratory Medicine &amp; Metro South Clinical Tuberculosis Service</p> <p>Zúñiga, Joaquin; Instituto Nacional de Enfermedades Respiratorias, Laboratory of Immunobiology and Genetics; Escuela de Medicina y Ciencias de Salud, Tecnológico de Monterrey</p> <p>Touw, Daan; University of Groningen, University Medical Center Groningen, Clinical Pharmacy and Pharmacology</p> <p>Migliori, Giovanni; Istituti Clinici Scientifici Maugeri IRCCS, Servizio di Epidemiologia Clinica delle Malattie Respiratorie</p> <p>Alffenaar, Jan-Willem; University of Groningen, University Medical Center Groningen, Clinical Pharmacy and Pharmacology; The University of Sydney, Sydney Pharmacy School, Faculty of Medicine and Health</p> |
| Keywords: | <p>Tuberculosis &lt; INFECTIOUS DISEASES, CLINICAL PHARMACOLOGY, Organisation of health services &lt; HEALTH SERVICES ADMINISTRATION &amp; MANAGEMENT, INFECTIOUS DISEASES</p>                                                                                                                                                                                                                                                                                                                                                                                                                                                                                                                                                                                                                                                                                                                                                                                                                                                                                                                                                                                                                                                                                                                                                                                                                                                                        |
|           |                                                                                                                                                                                                                                                                                                                                                                                                                                                                                                                                                                                                                                                                                                                                                                                                                                                                                                                                                                                                                                                                                                                                                                                                                                                                                                                                                                                                                                                       |

SCHOLARONE™  
Manuscripts

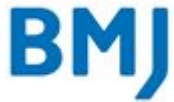

I, the Submitting Author has the right to grant and does grant on behalf of all authors of the Work (as defined in the below author licence), an exclusive licence and/or a non-exclusive licence for contributions from authors who are: i) UK Crown employees; ii) where BMJ has agreed a CC-BY licence shall apply, and/or iii) in accordance with the terms applicable for US Federal Government officers or employees acting as part of their official duties; on a worldwide, perpetual, irrevocable, royalty-free basis to BMJ Publishing Group Ltd ("BMJ") its licensees and where the relevant Journal is co-owned by BMJ to the co-owners of the Journal, to publish the Work in this journal and any other BMJ products and to exploit all rights, as set out in our [licence](#).

The Submitting Author accepts and understands that any supply made under these terms is made by BMJ to the Submitting Author unless you are acting as an employee on behalf of your employer or a postgraduate student of an affiliated institution which is paying any applicable article publishing charge ("APC") for Open Access articles. Where the Submitting Author wishes to make the Work available on an Open Access basis (and intends to pay the relevant APC), the terms of reuse of such Open Access shall be governed by a Creative Commons licence – details of these licences and which [Creative Commons](#) licence will apply to this Work are set out in our licence referred to above.

Other than as permitted in any relevant BMJ Author's Self Archiving Policies, I confirm this Work has not been accepted for publication elsewhere, is not being considered for publication elsewhere and does not duplicate material already published. I confirm all authors consent to publication of this Work and authorise the granting of this licence.

1  
2  
3 1 Prospective Evaluation of impROving Fluoroquinolone Exposure using Centralized TDM  
4  
5 2 in patients with Tuberculosis (PERFECT) – a study protocol of a prospective multicentre cohort study.  
6  
7 3  
8  
9  
10 4 Simone HJ van den Elsen<sup>a</sup>, Marieke GG Sturkenboom<sup>a</sup>, Onno W Akkerman<sup>b,c</sup>, Linda Barkane<sup>d</sup>, Judith  
11  
12 5 Bruchfeld<sup>e,f</sup>, Geoffrey Eather<sup>g</sup>, Scott K Heysell<sup>h</sup>, Henadz Hurevich<sup>i</sup>, Liga Kuksa<sup>d</sup>, Heinke Kunst<sup>j</sup>, Johanna  
13  
14 6 Kuhlin<sup>e,f</sup>, Katerina Manika<sup>k</sup>, Charalampos Moschos<sup>l</sup>, Stellah G Mpagama<sup>m</sup>, Marcela Muñoz-Torrico<sup>n</sup>,  
15  
16 7 Alena Skrahina<sup>o</sup>, Giovanni Sotgiu<sup>p</sup>, Marina Tadolini<sup>q</sup>, Simon Tiberi<sup>r</sup>, Francesca Volpato<sup>q</sup>, Tjip S van der  
17  
18 8 Werf<sup>c,s</sup>, Malcolm R Wilson<sup>g</sup>, Joaquin Zuñiga<sup>t</sup>, Daan J Touw<sup>a</sup> #, Giovanni B Migliori<sup>u</sup> #, and Jan-Willem C  
19  
20 9 Alffenaar<sup>a,v</sup> #  
21  
22  
23  
24  
25  
26  
27  
28  
29  
30  
31  
32  
33  
34  
35  
36  
37  
38  
39  
40  
41  
42  
43  
44  
45  
46  
47  
48  
49  
50  
51  
52  
53  
54  
55  
56  
57  
58  
59  
60

11 <sup>a</sup> University of Groningen, University Medical Center Groningen, Department of Clinical Pharmacy  
12 and Pharmacology, Groningen, The Netherlands.

13 <sup>b</sup> University of Groningen, University Medical Center Groningen, Tuberculosis Center Beatrixoord,  
14 Haren, The Netherlands

15 <sup>c</sup> University of Groningen, University Medical Center Groningen, Department of Pulmonary Diseases  
16 & Tuberculosis, Groningen, The Netherlands.

17 <sup>d</sup> MDR-TB department, Riga East University Hospital TB and Lung Disease Clinic, Riga, Latvia.

18 <sup>e</sup> Division of Infectious Diseases, Department of Medicine, Solna, Karolinska Institutet, Stockholm,  
19 Sweden.

20 <sup>f</sup> Department of Infectious Diseases, Karolinska University Hospital, Stockholm, Sweden.

21 <sup>g</sup> Department of Respiratory Medicine & Metro South Clinical Tuberculosis Service, Princess  
22 Alexandra Hospital, Woolloongabba, Queensland, Australia.

23 <sup>h</sup> Division of Infectious Diseases and International Health, University of Virginia, Charlottesville, VA,  
24 USA.

25 <sup>i</sup> The Republican Scientific and Practical Center for Pulmonology and Tuberculosis, Minsk, Belarus.

- 1  
2  
3 26 <sup>j</sup> Blizard Institute, Queen Mary University of London, Department of Respiratory Medicine, Barts  
4  
5 27 Health NHS Trust, London, United Kingdom.  
6  
7 28 <sup>k</sup> Pulmonary Department, Respiratory Infections Unit, Aristotle University of Thessaloniki, G.  
8  
9 29 Papanikolaou Hospital, Thessaloniki, Greece.  
10  
11  
12 30 <sup>l</sup> Drug-Resistant Tuberculosis Unit, "Sotiria" Hospital for Chest Diseases, Athens, Greece  
13  
14 31 <sup>m</sup> Kibong'oto Infectious Diseases Hospital, Kilimanjaro, Tanzania.  
15  
16 32 <sup>n</sup> Clínica de Tuberculosis, Instituto Nacional de Enfermedades Respiratorias, Mexico City, Mexico.  
17  
18 33 <sup>o</sup> The Republican Scientific and Practical Center for Pulmonology and Tuberculosis, Minsk, Belarus.  
19  
20 34 <sup>p</sup> Clinical Epidemiology and Medical Statistics Unit, Department of Medical, Surgical and Experimental  
21  
22 35 Sciences, University of Sassari, Sassari, Italy  
23  
24 36 <sup>q</sup> Unit of Infectious Diseases, Department of Medical and Surgical Sciences, Alma Mater Studiorum  
25  
26 37 University of Bologna, Bologna, Italy.  
27  
28 38 <sup>r</sup> Blizard Institute, Queen Mary University of London, Department of Infection, Barts Health NHS  
29  
30 39 Trust, London, United Kingdom  
31  
32 40 <sup>s</sup> University of Groningen, University Medical Center Groningen, Department of Internal Medicine,  
33  
34 41 Groningen, The Netherlands.  
35  
36 42 <sup>t</sup> Laboratory of Immunobiology and Genetics, Instituto Nacional de Enfermedades Respiratorias,  
37  
38 43 Mexico City, Mexico. Tecnologico de Monterrey, Escuela de Medicina y Ciencias de Salud, Mexico  
39  
40 44 City, Mexico.  
41  
42 45 <sup>u</sup> Servizio di Epidemiologia Clinica delle Malattie Respiratorie, Istituti Clinici Scientifici Maugeri IRCCS,  
43  
44 46 Tradate, Italy.  
45  
46 47 <sup>v</sup> Sydney Pharmacy School, Faculty of Medicine and Health, The University of Sydney, Sydney,  
47  
48 48 Australia  
49  
50 49  
51  
52 50 # Authors contributed equally  
53  
54  
55  
56  
57  
58  
59  
60

1  
2  
3  
4  
5  
6  
7  
8  
9  
10  
11  
12  
13  
14  
15  
16  
17  
18  
19  
20  
21  
22  
23  
24  
25  
26  
27  
28  
29  
30  
31  
32  
33  
34  
35  
36  
37  
38  
39  
40  
41  
42  
43  
44  
45  
46  
47  
48  
49  
50  
51  
52  
53  
54  
55  
56  
57  
58  
59  
60

52 Corresponding author: J.W.C. Alffenaar, University of Groningen, University Medical Center

53 Groningen, Department of Clinical Pharmacy and Pharmacology, Groningen, The Netherlands. Email:

54 [j.w.c.alfenaar@umcg.nl](mailto:j.w.c.alfenaar@umcg.nl)

55

56 Word count: 2604

For peer review only

**Abstract**

Introduction: Global multidrug-resistant tuberculosis (MDR-TB) treatment success rates remain suboptimal. Highly active World Health Organization (WHO) Group A drugs moxifloxacin and levofloxacin show intra- and inter-individual pharmacokinetic variability which can cause low drug exposure. Therefore, therapeutic drug monitoring (TDM) of fluoroquinolones is recommended to personalise the drug dosage, aiming to prevent development of drug resistance and optimize treatment. However, TDM is considered laborious and expensive, and the clinical benefit in MDR-TB has not been extensively studied. This observational multicentre study aims to determine the feasibility of centralized TDM and to investigate the impact of fluoroquinolone TDM on sputum conversion rates in patients with MDR-TB compared with historical controls.

Methods and analysis: Patients aged 18 years or older with sputum smear and culture positive pulmonary MDR-TB will be eligible for inclusion. Patients receiving TDM using a limited sampling strategy (t=0 and t=5 hours) will be matched to historical controls without TDM in a 1:2 ratio. Sample analysis and dosing advice will be performed in a centralized laboratory. Centralized TDM will be considered feasible if >80% of the dosing advices is returned within seven days after sampling and 100% within fourteen days. The number of patients who are sputum smear and culture negative after two months of treatment will be determined in the prospective TDM group and will be compared to the control group without TDM to determine the impact of TDM.

Ethics and dissemination: All participating centres obtained ethical clearance according to local procedures. Patients will be included after written informed consent. We aim to publish the study results in a peer-reviewed journal.

Trial registration: This study is registered at [clinicaltrials.gov](http://clinicaltrials.gov) (NCT03409315)



1  
2  
3 83 **Strengths and limitations of this study**  
4

- 5 84 • To our knowledge, this is the first study that investigates the impact of fluoroquinolone TDM  
6  
7 on sputum smear and culture conversion rates in prospective patients with MDR-TB versus  
8 85  
9 historical controls without TDM.  
10 86  
11  
12 87 • The feasibility for centralised TDM will be evaluated due to participation of multiple health  
13  
14 care centres located in differently resourced countries from multiple regions in the world.  
15 88  
16  
17 89 • The use of limited sampling strategies will reduce the burden of TDM for patients and health  
18  
19 care providers while still providing a reliable estimation of drug exposure.  
20 90  
21  
22 91 • A limitation is that this study focuses on TDM for moxifloxacin and levofloxacin only, being  
23  
24 core drugs in MDR-TB treatment, without assessing other (core) anti-tuberculosis drugs.  
25  
26  
27  
28 94  
29  
30  
31  
32  
33  
34  
35  
36  
37  
38  
39  
40  
41  
42  
43  
44  
45  
46  
47  
48  
49  
50  
51  
52  
53  
54  
55  
56  
57  
58  
59  
60

## 95 Introduction

96 Tuberculosis (TB) is one of the major infectious diseases worldwide with an estimated number of  
97 10.0 million new cases in 2017.[1] In addition, multidrug-resistant TB (MDR-TB) remains a persistent  
98 problem with an estimated 458,000 new patients in 2017.[1] MDR-TB is treated from 9-20 months  
99 with a multidrug regimen.[2] The grouping of second-line anti-TB drugs was revised in 2018 by the  
100 World Health Organisation (WHO).[3] The fluoroquinolones, specifically moxifloxacin and  
101 levofloxacin, are now considered drugs of first choice (Group A drugs), together with bedaquiline and  
102 linezolid, in the treatment of MDR-TB.[2,3] The administration of Group A medicines to patients with  
103 MDR-TB has been associated with increased treatment success and reduced mortality rates in  
104 comparison with other second-line anti-TB drugs.[4] However, the estimated prevalence of  
105 fluoroquinolone-resistance among MDR-TB cases is on the rise from 14.5% in 2011 to 22% in  
106 2017.[5,6] Mismanagement of MDR-TB treatment, especially the shorter regimen, could amplify the  
107 risk of drug resistance even further.[7] Importantly, antibiotic resistance can be acquired due to  
108 noncompliance but also insufficient drug exposures (e.g. inter-individual pharmacokinetic variability  
109 in patients treated with fluoroquinolones).[8–11] Therapeutic drug monitoring (TDM) can help to  
110 prevent acquired resistance by individualising doses based on blood drug concentrations relative to  
111 the bacterial susceptibility, ideally measured as the minimal inhibitory concentration (MIC).[7,12]  
112 Several studies described the role played by low drug concentrations on treatment outcomes.[13–  
113 15] In the light of this evidence, it can be hypothesized that TDM, which aims for adequate dosing  
114 and exposure, could improve treatment outcomes. Yet, the added value of TDM in MDR-TB  
115 treatment outcomes has not been directly studied.[16,17] One retrospective study reported the  
116 effect of TDM on the treatment results of patients with drug-susceptible TB, either with and without  
117 diabetes.[18] In the group without diabetes, TDM had a significant beneficial effect with 73%  
118 sputum culture conversion at two months amongst patients receiving TDM versus 60% in the control  
119 group. The positive effect of TDM was even larger in patients with diabetes and TB. To the best of  
120 our knowledge, such controlled studies have not yet been performed in people with MDR-TB.

1  
2  
3 121 The pharmacokinetic-pharmacodynamic parameter of fluoroquinolones is both time- and  
4  
5 122 concentration dependent and therefore uses the ratio of area under the concentration time curve to  
6  
7 123 minimal inhibitory concentration ( $AUC_{0-24}/MIC$ ) with a target value of >146 for levofloxacin and free  
8  
9  
10 124 or unbound  $fAUC_{0-24}/MIC >53$  for moxifloxacin.[19,20] However, multiple concentration  
11  
12 125 measurements widely distributed over the dosing interval are required to compute the  $AUC_{0-24}$ .  
13  
14 126 Limited sampling strategies (LSS) could be adopted to reduce the burden of frequent sampling for  
15  
16 127 both patient and personnel while providing a reliable estimation of  $AUC_{0-24}$  using only two blood  
17  
18 128 samples.[21,22]  
19  
20 129 Unfortunately, TDM is not always easily accessible in high TB burden areas because of practical and  
21  
22 130 financial reasons. Therefore, centralized TDM could be a valuable service.[23] Large laboratories are  
23  
24 131 generally well organised, have highly trained personnel with adequate performance of analytical  
25  
26 132 methods leading to reliable sample analysis results.[24] In addition, centralizing the TDM procedures  
27  
28 133 will engender more consistent practice from health care practitioners familiar with TDM and the  
29  
30 134 provision of dosing advice for anti-tuberculosis drugs.  
31  
32 135 The aim of the present study is, firstly, to investigate the feasibility of centralized TDM of  
33  
34 136 moxifloxacin and levofloxacin in the treatment of MDR-TB recruited in TB reference centres located  
35  
36 137 in different continents. Secondly, the impact of TDM on treatment results will be assessed by  
37  
38 138 comparing two month sputum smear and culture conversion rates among patients who received  
39  
40 139 TDM compared with matched historical controls without TDM.  
41  
42  
43  
44  
45  
46  
47

## 141 **Methods and analysis**

142

### 143 Study design

144 This observational, prospective, multicentre study aims to evaluate the feasibility of centralized TDM  
145 of moxifloxacin and levofloxacin as well as the impact of TDM on two month sputum smear and  
146 culture conversion rates of patients with MDR-TB. Study design and procedures are displayed in

1  
2  
3 147 Figure 1. The study was registered at clinicaltrials.gov (NCT03409315) and started on 10 February  
4  
5 148 2018.

6  
7 149

8  
9  
10 150 Study location

11  
12 151 University Medical Center Groningen (UMCG) in Groningen, The Netherlands is the coordinating  
13  
14 152 centre and serves as central laboratory facility for this study. The hospitals that are involved in  
15  
16 153 patient recruitment are displayed in Table 1.

17  
18 154

19  
20  
21 155 Study population

22  
23 156 Patients aged 18 years and older are eligible for inclusion if they are diagnosed with pulmonary MDR-  
24  
25 157 TB, have positive sputum smear and culture samples at time of inclusion, are treated with either oral  
26  
27 158 moxifloxacin or levofloxacin, and provide written informed consent. Pregnant or breast feeding  
28  
29 159 women will be excluded.

30  
31  
32 160 A total number of 120 patients (60 with moxifloxacin, 60 with levofloxacin) will be prospectively  
33  
34 161 included and compared with 240 matched historical controls (120 with moxifloxacin, 120 with  
35  
36 162 levofloxacin).

37  
38  
39 163 Historical control patients will be matched on age, sex, *M. tuberculosis* resistance pattern of the  
40  
41 164 isolate (only regimen core drugs), comorbidities (HIV, diabetes, immunosuppression), presence or  
42  
43 165 absence of cavitary TB on chest radiography, and dosing of the fluoroquinolone (mg/kg body weight,  
44  
45 166  $\pm 10\%$ ) to prospectively enrolled patients in a 2:1 ratio.

46  
47 167

48  
49  
50 168 Interventions

51  
52 169 The objective of the feasibility of centralized TDM will be assessed by evaluating the process, by  
53  
54 170 which a locally collected sample will be analysed in a central laboratory and subsequent dosing  
55  
56 171 advice will be returned to the local physician. In brief, after at least seven days of treatment (steady  
57  
58 172 state) two blood samples will be collected for TDM of moxifloxacin or levofloxacin according to a  
59  
60

1  
2  
3 173 previously developed LSS.[21,22] The first sample will be collected just before drug intake (t=0) and  
4  
5 174 the other at 5 hours after drug intake (t=5). Samples will be transported to the central laboratory for  
6  
7 175 drug analysis and will be accompanied by a form including key patient characteristics for  
8  
9  
10 176 personalised dosing advice (i.e. sex, age, weight, height, serum creatinine, corrected QT (QTc)  
11  
12 177 interval, MIC, TB presentation, start of treatment, other anti-TB drugs, and comorbidities).  $AUC_{0-24}$   
13  
14 178 will be calculated using a population pharmacokinetic model [21,22] and Bayesian dose optimisation  
15  
16 179 in MWPharm++ (version 1.7.3; Mediware, Groningen, The Netherlands).  
17  
18  
19 180 Dosing is optimised based on  $AUC_{0-24}/MIC$  or  $AUC_{0-24}$  (in case MIC is unknown), taking into  
20  
21 181 consideration comorbidities (HIV, diabetes, and immunosuppression) and clinical condition of the  
22  
23 182 patient. The target  $AUC_{0-24}/MIC$  and  $AUC_{0-24}$  are shown in Table 1. If a dose change is necessary, TDM  
24  
25 183 is to be repeated after at least seven days after the initiation of the new dose (steady state). Dose  
26  
27 184 increases of moxifloxacin will not be advised in case of a prolonged QTc interval (>450 ms for males,  
28  
29 >470 ms for females), because of safety reasons. As levofloxacin is less cardiotoxic than moxifloxacin,  
30  
31 185 levofloxacin dose increases are permitted in case of prolonged QTc interval with frequent  
32  
33 186 electrocardiogram monitoring. Patients with prolonged QTc interval will not be excluded from the  
34  
35 187 study, since TDM can still be helpful to verify drug exposure. A closely monitored follow-up including  
36  
37 188 MIC determination can be advised in case of  $AUC_{0-24}$  of 25 to 40 mg\*h/L in combination with QTc  
38  
39 189 interval prolongation. In case of very low moxifloxacin exposure ( $AUC_{0-24}<20$  mg\*h/L) in combination  
40  
41 190 with a prolonged QTc interval, the physician will be advised to reconsider the anti-TB regimen as  
42  
43 191 moxifloxacin may be less active than expected.  
44  
45 192  
46  
47  
48 193  
49

#### 194 Laboratory methods

##### 195 Drug analysis:

196 Measurement of moxifloxacin and levofloxacin plasma/serum concentrations will take place at the  
197 laboratory of the department of Clinical Pharmacy and Pharmacology in the UMCG, The Netherlands,  
198 and using validated liquid chromatography-mass spectrometry (LC-MS/MS) methods. The method for  
199  
200

1  
2  
3 199 levofloxacin has an accuracy of 0.1-12.7%, within-run precision of 1.4-2.4%, and between-run  
4  
5 200 precision of 3.6-4.1%. The calibration curve is linear over a range of 0.10 to 5.00 mg/L.[25] Accuracy  
6  
7 201 of the moxifloxacin method is 2.7-7.1%, within-run precision 1.4-1.6%, and between-run precision  
8  
9 202 1.0-1.6%. The calibration curve is linear over a range of 0.05 to 5.00 mg/L.[26] Only the total  
10  
11 203 moxifloxacin concentration (bound and unbound) will be measured, therefore we assume a constant  
12  
13 204 protein binding of 50%.[27]  
14  
15  
16 205 Plasma and serum samples containing levofloxacin are stable for at least ten days at 50 °C and can  
17  
18 206 therefore be transported to the central facility in ambient temperature, without the need of  
19  
20 207 transport on dry ice.[28] The thermal stability of moxifloxacin was also tested according to the  
21  
22 208 method of Ghimire *et al* and showed that moxifloxacin serum and plasma samples are stable for at  
23  
24 209 least ten days at 50 °C as well (data on file).  
25  
26  
27  
28  
29

#### 30 211 Microbiology:

31  
32 212 The assessment of sputum smear and culture status after two months of MDR-TB treatment will be  
33  
34 213 performed according to the local procedures, but at least once a month until documented culture  
35  
36 214 conversion. MIC determination is preferred but not mandatory for TDM and will be performed  
37  
38 215 according to local procedures as well. To account for the differences in culture media used in drug  
39  
40 216 susceptibility testing, correction factors based on the critical concentrations in the WHO-document  
41  
42 217 “Technical Report on critical concentrations for drug susceptibility testing of medicines used in the  
43  
44 218 treatment of drug-resistant tuberculosis” will be applied.[29] The target  $AUC_{0-24}/MIC$  values for each  
45  
46 219 medium are shown in Table 2. Furthermore, second line molecular drug susceptibility tests will be  
47  
48 220 considered in case MIC data are not available.  
49  
50  
51

52 221

#### 53 222 Data analysis plan

54  
55  
56 223 The primary outcome to assess the feasibility of centralized TDM will be the turn-around time, which  
57  
58 224 is defined by the time between blood sampling and the peripheral centres receiving the TDM results  
59  
60

1  
2  
3 225 including the dosing advice. The procedure is considered feasible if >80% of the collected samples  
4  
5 226 will be reported back to the physician within seven days and 100% within two weeks. Additionally,  
6  
7 227 the feasibility will be evaluated using secondary outcomes of sample quality after shipping and  
8  
9 228 completeness of required information on the sample form.  
10  
11  
12 229 Furthermore, we will evaluate the role of TDM on MDR-TB treatment by comparing the percentages  
13  
14 230 of patients with sputum smear and culture conversion at two months in the enrolled groups. In  
15  
16 231 addition, we will evaluate the number of patients with low fluoroquinolone exposure requiring dose  
17  
18 232 changes after TDM to estimate the potential gains.  
19  
20  
21 233

### 23 234 Sample size calculation

25 235 As the primary endpoint was of descriptive nature and no data were available to perform a well-  
26  
27 236 informed sample size calculation, it was decided to power the study on the clinical impact of TDM.  
28  
29 237 The primary assumption was based on the detection of a proportional difference in sputum smear  
30  
31 238 and culture positivity at two months of treatment in patients with MDR-TB undergoing TDM (35%)  
32  
33 239 [30] and control patients (60%)[31]. Given an alpha error of 0.05 and statistical power of 80%, we  
34  
35 240 calculated a sample size of 60 per single group is needed (i.e. 60 prospective and 120 historical  
36  
37 241 control patients for moxifloxacin and equally for levofloxacin).  
38  
39  
40  
41 242

### 43 243 **Ethics and dissemination**

45 244 This study will be performed according to the Declaration of Helsinki and Good Clinical Practice.[32]  
46  
47  
48 245 In each centre ethical clearance has been granted according to local regulations and patient  
49  
50 246 recruitment has begun at most sites. Written informed consent will be obtained from all patients  
51  
52 247 undergoing TDM. The need of new informed consent for historical controls was waived, because of  
53  
54 248 the use of retrospective anonymous data collected for programmatic purposes or previously  
55  
56 249 reported data from studies for which patients had provided informed consent.  
57  
58  
59  
60

1  
2  
3 250 This study includes historical patients who did not receive TDM as controls instead of prospectively  
4  
5 251 randomising patients to either receive or not receive TDM for ethical reasons. The evidence that  
6  
7 252 TDM actually improves MDR-TB treatment outcomes has not been confirmed in randomised  
8  
9 253 controlled trials, but multiple studies have described treatment failure and risk of antibiotic  
10  
11 254 resistance due to sub therapeutic drug exposure of anti-TB drugs.[8,13,15,19,20] In combination with  
12  
13 255 a large between-patient pharmacokinetic variability [9,10], we hypothesize that TDM is able to  
14  
15 256 improve treatment outcomes by ensuring adequate exposure in individual patients. Moreover, TDM  
16  
17 257 for MDR-TB is recommended in guidelines when it is available.[2,33,34] We therefore considered it  
18  
19 258 unethical to withhold TDM.  
20  
21 259 Study results will be published in a peer-reviewed journal and will be presented at an international  
22  
23 260 conference.  
24  
25  
26  
27  
28  
29

## 30 262 **Discussion**

31  
32 263 We present an observational prospective multicentre study which aims to: a) evaluate the feasibility  
33  
34 264 of centralized TDM in differently resourced settings of varying TB endemicity and geographic region  
35  
36 265 and b) evaluate the role of TDM of moxifloxacin or levofloxacin on sputum smear and culture  
37  
38 266 conversion rates in patients with MDR-TB after two months of treatment.  
39  
40 267 Presently, TDM is offered as an adjunctive to patients with TB in only a few hospitals worldwide and  
41  
42 268 is considered to be part of the excellent clinical care.[16,23,35–37] However, general interest in TDM  
43  
44 269 and MDR-TB treatment optimization has been increasing. A consensus statement on the diagnosis  
45  
46 270 and treatment of MDR-TB in Europe states that TDM for second-line drugs should be used if  
47  
48 271 available.[34] Moreover, the use of second-line anti-TB drugs was listed in the American Thoracic  
49  
50 272 Society (ATS) guidelines as indication for TDM and TDM is also recommended in the European Union  
51  
52 273 Standards for Tuberculosis Prevention and Care.[33,38] Yet, TDM is considered by some to be  
53  
54 274 laborious, expensive and thus unpractical in countries with high TB incidence. Similar injurious  
55  
56 275 arguments of economic rationing of services were applied to second-line drugs for the treatment  
57  
58  
59  
60



1  
2  
3 276 of MDR-TB in highly endemic settings and such rationing conversely led to amplification of the MDR-  
4  
5 277 TB epidemic.[39] This study will focus on the feasibility of centralized TDM, which could stimulate  
6  
7 278 performing TDM more often as it requires only one qualified laboratory with validated analytical  
8  
9 279 methods and devices in a central location. Other options to facilitate TDM are the implementation of  
10  
11 280 LSS, urine samples, dried-blood spots and saliva-screening methods.[35,40–42] Although  
12  
13 281 incorporating TDM in TB treatment has shown to give high treatment success rates in low endemic  
14  
15 282 countries, like the Netherlands [30], this has not yet been evaluated in well-designed randomized  
16  
17 283 controlled trials.[43] This study will provide a first-ever conclusion on the value of TDM of  
18  
19 284 moxifloxacin and levofloxacin on sputum smear and culture conversion of patients with MDR-TB.  
20  
21 285 It can be considered a limitation that only TDM of fluoroquinolones is performed in this study.  
22  
23 286 However, moxifloxacin and levofloxacin are currently among the core drugs in the MDR-treatment  
24  
25 287 regimen together with linezolid and bedaquiline.[3] Based on TDM criteria [44], we have selected  
26  
27 288 moxifloxacin and levofloxacin, because they show large inter-individual pharmacokinetic variability,  
28  
29 289 which emphasizes the need for personalized dosing.[9,10] Moreover, fluoroquinolone resistance is  
30  
31 290 on the rise and can develop during low drug exposure.[8] TDM of fluoroquinolones aims to find the  
32  
33 291 individual patients who have low drug exposure and would benefit from dose adjustment. Therefore,  
34  
35 292 it is expected that TDM of fluoroquinolones will have the largest impact on MDR-TB treatment  
36  
37 293 outcomes. We did not include TDM for linezolid and bedaquiline in this study, because of unclear  
38  
39 294 evidence for TDM of bedaquiline due to the novelty of the drug [45] and TDM of linezolid has  
40  
41 295 focussed more on preventing toxicity.[46–48]  
42  
43 296 Another limitation is that we are only evaluating interim outcomes such as sputum conversion rates  
44  
45 297 at two months and will not assess outcomes at the end of treatment. However, this study is primarily  
46  
47 298 designed to determine the feasibility of centralized TDM. In addition, this is the first study to  
48  
49 299 evaluate the impact of fluoroquinolone TDM. We believe that reporting the results on sputum  
50  
51 300 conversion rates is relevant as bacterial load and risk of acquired resistance are highest in the first  
52  
53 301 months of therapy. Fast sputum culture conversion reduces the risk of transmission of *M.*  
54  
55  
56  
57  
58  
59  
60

1  
2  
3 302 *tuberculosis* strains which continues to sustain the MDR-TB epidemic.[49] With the results of this  
4  
5 303 study we aim to design a future study to extensively evaluate TDM of all drugs in the regimen  
6  
7 304 including the final treatment outcomes. However, such study would require substantial funding.  
8  
9  
10 305 We hope that this study will show that centralized TDM is feasible and that TDM can improve the  
11  
12 306 quality of treatment in terms of faster sputum conversion rates compared to historical experience. If  
13  
14 307 that might be the case, the major hesitations about TDM in TB treatment can be attenuated  
15  
16 308 favouring the improvement of TB management using a personalized approach.[38]  
17  
18  
19 309  
20

## 21 310 **References**

- 22  
23 311 1 World Health Organization. Global tuberculosis report 2018. 2018.  
24  
25 312 2 World Health Organization. WHO consolidated guidelines on drug-resistant tuberculosis  
26  
27 313 treatment. 2019.  
28  
29  
30 314 3 World Health Organization. Rapid Communication: Key changes to treatment of multidrug-  
31  
32 315 and rifampicin-resistant tuberculosis (MDR/RR-TB). 2018.  
33  
34 316 4 Ahmad N, Ahuja SD, Akkerman OW, *et al.* Treatment correlates of successful outcomes in  
35  
36 317 pulmonary multidrug-resistant tuberculosis: an individual patient data meta-analysis. *Lancet*  
37  
38 318 2018;**392**:821–34. doi:10.1016/S0140-6736(18)31644-1  
39  
40  
41 319 5 Alffenaar J-WC, Migliori GB, Gumbo T. Multidrug-resistant tuberculosis: pharmacokinetic and  
42  
43 320 pharmacodynamic science. *Lancet. Infect. Dis.* 2017;**17**:898. doi:10.1016/S1473-  
44  
45 321 3099(17)30449-8  
46  
47  
48 322 6 World Health Organization. Global tuberculosis report 2012. 2012.  
49  
50 323 7 Davies Forsman L, Bruchfeld J, Alffenaar J-WC. Therapeutic drug monitoring to prevent  
51  
52 324 acquired drug resistance of fluoroquinolones in the treatment of tuberculosis. *Eur Respir J*  
53  
54 325 2017;**49**. doi:10.1183/13993003.00173-2017  
55  
56  
57 326 8 Srivastava S, Pasipanodya JG, Meek C, *et al.* Multidrug-resistant tuberculosis not due to  
58  
59 327 noncompliance but to between-patient pharmacokinetic variability. *J Infect Dis*  
60

- 1  
2  
3 328 2011;**204**:1951–9. doi:10.1093/infdis/jir658  
4  
5 329 9 Van't Boveneind-Vrubleuskaya N, Seuruk T, van Hateren K, *et al.* Pharmacokinetics of  
6  
7 330 Levofloxacin in Multidrug- and Extensively Drug-Resistant Tuberculosis Patients. *Antimicrob*  
8  
9 331 *Agents Chemother* 2017;**61**:e00343-17. doi:10.1128/AAC.00343-17  
10  
11 332 10 Pranger AD, van Altena R, Aarnoutse RE, *et al.* Evaluation of moxifloxacin for the treatment of  
12  
13 333 tuberculosis: 3 years of experience. *Eur Respir J* 2011;**38**:888–94.  
14  
15 334 doi:10.1183/09031936.00176610  
16  
17 335 11 Ghimire S, Van't Boveneind-Vrubleuskaya N, Akkerman OW, *et al.*  
18  
19 336 Pharmacokinetic/pharmacodynamic-based optimization of levofloxacin administration in the  
20  
21 337 treatment of MDR-TB. *J Antimicrob Chemother* 2016;**71**:2691–703. doi:10.1093/jac/dkw164  
22  
23 338 12 Alffenaar J-WC, Gumbo T, Aarnoutse RE. Acquired drug resistance: we can do more than we  
24  
25 339 think! *Clin. Infect. Dis.* 2015;**60**:969–70. doi:10.1093/cid/ciu1146  
26  
27 340 13 Pasipanodya JG, McIlleron H, Burger A, *et al.* Serum drug concentrations predictive of  
28  
29 341 pulmonary tuberculosis outcomes. *J Infect Dis* 2013;**208**:1464–73. doi:10.1093/infdis/jit352  
30  
31 342 14 Modongo C, Pasipanodya JG, Magazi BT, *et al.* Artificial Intelligence and Amikacin Exposures  
32  
33 343 Predictive of Outcomes in Multidrug-Resistant Tuberculosis Patients. *Antimicrob Agents*  
34  
35 344 *Chemother* 2016;**60**:5928–32. doi:10.1128/AAC.00962-16  
36  
37 345 15 Sekaggya-Wiltshire C, von Braun A, Lamorde M, *et al.* Delayed Sputum Conversion in TB-HIV  
38  
39 346 Co-Infected Patients with Low Isoniazid and Rifampicin Concentrations. *Clin Infect Dis*  
40  
41 347 2018;**67**:708–16. doi:10.1093/cid/ciy179  
42  
43 348 16 Alffenaar J-WC, Tiberi S, Verbeeck RK, *et al.* Therapeutic Drug Monitoring in Tuberculosis:  
44  
45 349 Practical Application for Physicians. *Clin Infect Dis* 2017;**64**:104–5. doi:10.1093/cid/ciw677  
46  
47 350 17 Peloquin C. The Role of Therapeutic Drug Monitoring in Mycobacterial Infections. *Microbiol*  
48  
49 351 *Spectr* 2017;**5**:TNMI7-0029–2016. doi:10.1128/microbiolspec.TNMI7-0029-2016  
50  
51 352 18 Alkabab Y, Keller S, Dodge D, *et al.* Early interventions for diabetes related tuberculosis  
52  
53 353 associate with hastened sputum microbiological clearance in Virginia, USA. *BMC Infect Dis*  
54  
55  
56  
57  
58  
59  
60

- 1  
2  
3 354 2017;**17**:125:1–8. doi:10.1186/s12879-017-2226-y  
4  
5 355 19 Deshpande D, Pasipanodya JG, Mpagama SG, *et al.* Levofloxacin  
6  
7 356 Pharmacokinetics/Pharmacodynamics, Dosing, Susceptibility Breakpoints, and Artificial  
8  
9 357 Intelligence in the Treatment of Multidrug-resistant Tuberculosis. *Clin Infect Dis*  
10  
11 358 2018;**67**:S293–302. doi:10.1093/cid/ciy611  
12  
13  
14 359 20 Gumbo T, Louie A, Deziel MR, *et al.* Selection of a moxifloxacin dose that suppresses drug  
15  
16 360 resistance in *Mycobacterium tuberculosis*, by use of an in vitro pharmacodynamic infection  
17  
18 361 model and mathematical modeling. *J Infect Dis* 2004;**190**:1642–51. doi:10.1086/424849  
19  
20  
21 362 21 van den Elsen SHJ, Sturkenboom MGG, Van't Boveneind-Vrubleuskaya N, *et al.* Population  
22  
23 363 Pharmacokinetic Model and Limited Sampling Strategies for Personalized Dosing of  
24  
25 364 Levofloxacin in Tuberculosis Patients. *Antimicrob Agents Chemother* 2018;**62**.  
26  
27 365 doi:10.1128/AAC.01092-18  
28  
29  
30 366 22 van den Elsen SHJ, Sturkenboom MGG, Akkerman OW, *et al.* Limited sampling strategies using  
31  
32 367 linear regression and the Bayesian approach for therapeutic drug monitoring of moxifloxacin  
33  
34 368 in tuberculosis patients. *Antimicrob Agents Chemother* Published Online First: April 2019.  
35  
36 369 doi:10.1128/AAC.00384-19  
37  
38  
39 370 23 Ghimire S, Bolhuis MS, Sturkenboom MGG, *et al.* Incorporating therapeutic drug monitoring  
40  
41 371 into the World Health Organization hierarchy of tuberculosis diagnostics. *Eur Respir J*  
42  
43 372 2016;**47**:1867–9. doi:10.1183/13993003.00040-2016  
44  
45  
46 373 24 Schimke I. Quality and timeliness in medical laboratory testing. *Anal Bioanal Chem*  
47  
48 374 2009;**393**:1499–504. doi:10.1007/s00216-008-2349-5  
49  
50 375 25 Ghimire S, van Hateren K, Vrubleuskaya N, *et al.* Determination of levofloxacin in human  
51  
52 376 serum using liquid chromatography tandem mass spectrometry. *J Appl Bioanal* 2018;**4**:16–25.  
53  
54 377 doi:10.17145/jab.18.004  
55  
56  
57 378 26 Pranger AD, Alffenaar J-WC, Wessels AMA, *et al.* Determination of moxifloxacin in human  
58  
59 379 plasma, plasma ultrafiltrate, and cerebrospinal fluid by a rapid and simple liquid  
60

- 1  
2  
3 380 chromatography- tandem mass spectrometry method. *J Anal Toxicol* 2010;**34**:135–41.  
4  
5 381 27 Wright DH, Brown GH, Peterson ML, *et al.* Application of fluoroquinolone pharmacodynamics.  
6  
7 382 *J Antimicrob Chemother* 2000;**46**:669–83.  
8  
9  
10 383 28 Ghimire S, Jongedijk EM, van den Elsen SHJ, *et al.* Cross validation of liquid chromatography  
11  
12 384 tandem mass spectrometry method for quantification of levofloxacin in saliva. *Submitted*  
13  
14 385 29 World Health Organization. Technical Report on critical concentrations for drug susceptibility  
15  
16 386 testing of medicines used in the treatment of drug-resistant tuberculosis. 2018.  
17  
18 387 30 van Altena R, de Vries G, Haar CH, *et al.* Highly successful treatment outcome of multidrug-  
19  
20 388 resistant tuberculosis in the Netherlands, 2000-2009. *Int J Tuberc Lung Dis* 2015;**19**:406–12.  
21  
22 389 doi:10.5588/ijtld.14.0838  
23  
24  
25 390 31 Sotgiu G, Centis R, D’Ambrosio L, *et al.* Efficacy, safety and tolerability of linezolid containing  
26  
27 391 regimens in treating MDR-TB and XDR-TB: systematic review and meta-analysis. *Eur Respir J*  
28  
29 392 2012;**40**:1430–42. doi:10.1183/09031936.00022912  
30  
31  
32 393 32 World Medical Association Declaration of Helsinki: ethical principles for medical research  
33  
34 394 involving human subjects. *JAMA* 2013;**310**:2191–4. doi:10.1001/jama.2013.281053  
35  
36 395 33 Nahid P, Dorman SE, Alipanah N, *et al.* Official American Thoracic Society/Centers for Disease  
37  
38 396 Control and Prevention/Infectious Diseases Society of America Clinical Practice Guidelines:  
39  
40 397 Treatment of Drug-Susceptible Tuberculosis. *Clin Infect Dis* 2016;**63**:147–95.  
41  
42 398 doi:10.1093/cid/ciw376  
43  
44  
45 399 34 Lange C, Abubakar I, Alffenaar J-WC, *et al.* Management of patients with multidrug-  
46  
47 400 resistant/extensively drug-resistant tuberculosis in Europe: a TBNET consensus statement.  
48  
49 401 *Eur. Respir. J.* 2014;**44**:23–63. doi:10.1183/09031936.00188313  
50  
51  
52 402 35 Alffenaar J-WC, Heysell SK, Mpagama SG. Therapeutic Drug Monitoring: The Need for  
53  
54 403 Practical Guidance. *Clin Infect Dis* 2019;**68**:1065–6. doi:10.1093/cid/ciy787  
55  
56  
57 404 36 Lange C, Dheda K, Chesov D, *et al.* Management of drug-resistant tuberculosis. *Lancet*  
58  
59 405 (*London, England*) 2019;**394**:953–66. doi:10.1016/S0140-6736(19)31882-3  
60

- 1  
2  
3 406 37 Alffenaar J-WC, Gumbo T, Dooley KE, *et al.* Integrating pharmacokinetics and  
4  
5 407 pharmacodynamics in operational research to End TB. *Clin Infect Dis* Published Online First:  
6  
7 408 September 2019. doi:10.1093/cid/ciz942  
8  
9  
10 409 38 Migliori GB, Sotgiu G, Rosales-Klitz S, *et al.* ERS/ECDC Statement: European Union standards  
11  
12 410 for tuberculosis care, 2017 update. *Eur Respir J* 2018;**51**:1702678.  
13  
14 411 doi:10.1183/13993003.02678-2017  
15  
16 412 39 Nicholson T, Admay C, Shakow A, *et al.* Double Standards in Global Health: Medicine, Human  
17  
18 413 Rights Law and Multidrug-Resistant TB Treatment Policy. *Health Hum Rights* 2016;**18**:85–102.  
19  
20  
21 414 40 Ghimire S, Maharjan B, Jongedijk EM, *et al.* Evaluation of Saliva as a Potential Alternative  
22  
23 415 Sampling Matrix for Therapeutic Drug Monitoring of Levofloxacin in Patients with Multidrug-  
24  
25 416 Resistant Tuberculosis. *Antimicrob Agents Chemother* 2019;**63**:e02379-18.  
26  
27 417 doi:10.1128/AAC.02379-18  
28  
29  
30 418 41 Zuur MA, Bolhuis MS, Anthony R, *et al.* Current status and opportunities for therapeutic drug  
31  
32 419 monitoring in the treatment of tuberculosis. *Expert Opin Drug Metab Toxicol* 2016;**12**:509–21.  
33  
34 420 doi:10.1517/17425255.2016.1162785  
35  
36  
37 421 42 Zentner I, Modongo C, Zetola NM, *et al.* Urine colorimetry for therapeutic drug monitoring of  
38  
39 422 pyrazinamide during tuberculosis treatment. *Int J Infect Dis* 2018;**68**:18–23.  
40  
41 423 doi:10.1016/j.ijid.2017.12.017  
42  
43  
44 424 43 van der Burgt EPM, Sturkenboom MGG, Bolhuis MS, *et al.* End TB with precision treatment!  
45  
46 425 *Eur Respir J* 2016;**47**:680 LP – 682. doi:10.1183/13993003.01285-2015  
47  
48 426 44 Figueras A. WHO report ‘Review of the evidence to include TDM in the Essential in vitro  
49  
50 427 Diagnostics List and prioritization of medicines to be monitored’. 2019.  
51  
52 428 45 Borisov SE, Dheda K, Enwerem M, *et al.* Effectiveness and safety of bedaquiline-containing  
53  
54 429 regimens in the treatment of MDR- and XDR-TB: a multicentre study. *Eur Respir J*  
55  
56 430 2017;**49**:1700387. doi:10.1183/13993003.00387-2017  
57  
58  
59 431 46 Bolhuis MS, Tiberi S, Sotgiu G, *et al.* Is there still room for therapeutic drug monitoring of  
60

- 1  
2  
3 432 linezolid in patients with tuberculosis? *Eur Respir J* 2016;**47**:1288 LP – 1290.  
4  
5 433 doi:10.1183/13993003.02185-2015  
6  
7 434 47 Alffenaar J-WC, van Altena R, Harmelink IM, *et al.* Comparison of the pharmacokinetics of two  
8  
9 dosage regimens of linezolid in multidrug-resistant and extensively drug-resistant tuberculosis  
10 435 patients. *Clin Pharmacokinet* 2010;**49**:559–65. doi:10.2165/11532080-000000000-00000  
11 436  
12 437 48 Bolhuis MS, Akkerman OW, Sturkenboom MGG, *et al.* Linezolid-based Regimens for  
13  
14 Multidrug-resistant Tuberculosis (TB): A Systematic Review to Establish or Revise the Current  
15 438 Recommended Dose for TB Treatment. *Clin Infect Dis* 2018;**67**:S327–35.  
16 439  
17 doi:10.1093/cid/ciy625  
18 440  
19 441 49 Migliori GB, Nardell E, Yedilbayev A, *et al.* Reducing tuberculosis transmission: a consensus  
20 442 document from the World Health Organization Regional Office for Europe. *Eur Respir J*  
21 443 2019;**53**:1900391. doi:10.1183/13993003.00391-2019  
22 444  
23  
24  
25  
26  
27  
28  
29  
30  
31

32 445 Acknowledgements:

33  
34 446 The project is part of the scientific activities of the Global Tuberculosis Network (GTN; Committees  
35 447 on pharmacology- chair Jan-Willem C Alffenaar; Treatment- chair Marcela Muñoz-Torrico and Global  
36 448 TB Consilium- chairs M. Tadolini and S. Tiberi) and of the WHO Collaborating Centre for Tuberculosis  
37 449 and Lung Diseases, Tradate, ITA-80, 2017-2020- GBM/RC/LDA.  
38  
39  
40  
41  
42

43 450

44  
45 451 Author contributions:

46  
47 452 SE, MS, DT, GB, JWA designed the major outlines of the study. OA, LB, JB, GE, SH, HH, LK, HK, JK, KM,  
48 453 CM, SM, MM, AS, GS, MT, ST, FV, TW, MW, JZ contributed to the study design. OA, LB, JB, GE, SH, HH,  
49 454 LK, HK, JK, KM, CM, SM, MM, AS, MT, ST, FV, TW, MW, JZ will include patients in the study. GS  
50 455 performed the sample size calculation. SE wrote the first draft of the manuscript together with MS,  
51 456 DT, JWA. All authors read and approved the final version of the manuscript.  
52  
53  
54  
55  
56  
57  
58  
59  
60

1  
2  
3 458 Funding statement: This research received no specific grant from any funding agency in the public,  
4  
5 459 commercial or not-for-profit sectors.  
6

7  
8 460

9  
10 461 Competing interests: none declared  
11

12 462  
13  
14  
15  
16  
17  
18  
19  
20  
21  
22  
23  
24  
25  
26  
27  
28  
29  
30  
31  
32  
33  
34  
35  
36  
37  
38  
39  
40  
41  
42  
43  
44  
45  
46  
47  
48  
49  
50  
51  
52  
53  
54  
55  
56  
57  
58  
59  
60

For peer review only



1  
2  
3 463 **Figure 1. Workflow of study procedures in local hospitals and central laboratory facility.**

4  
5  
6 464

7  
8 465

9  
10 466 **Table 1. List of participating hospitals and their location**

| Hospital                                                                    | Location                   |
|-----------------------------------------------------------------------------|----------------------------|
| University Medical Center Groningen (central lab facility)                  | Groningen, The Netherlands |
| Tuberculosis Clinic "Beatrixoord", UMCG                                     | Haren, The Netherlands     |
| Princess Alexandra Hospital                                                 | Brisbane, Australia        |
| Karolinska University Hospital                                              | Stockholm, Sweden          |
| Instituto Nacional de Enfermedades Respiratorias                            | Mexico City, Mexico        |
| Athens Chest Hospital "Sotiria"                                             | Athens, Greece             |
| Kibong'oto Infectious Diseases Hospital                                     | Kilimanjaro, Tanzania      |
| Republican Scientific and Practical Centre for Pulmonology and Tuberculosis | Minsk, Belarus             |
| Barts Health NHS trust                                                      | London, United Kingdom     |
| St. Orsola-Malpighi Hospital, University of Bologna                         | Bologna, Italy             |
| Riga East University Hospital TB and Lung Disease Clinic                    | Riga, Latvia               |

11  
12  
13  
14  
15  
16  
17  
18  
19  
20  
21  
22  
23  
24  
25  
26  
27  
28  
29  
30  
31  
32  
33  
34  
35  
36  
37  
38  
39  
40  
41  
42 467

43  
44 468  
45  
46  
47  
48  
49  
50  
51  
52  
53  
54  
55  
56  
57  
58  
59  
60

469 **Table 2. Target  $AUC_{0-24}/MIC$  and  $AUC_{0-24}$  for TDM of moxifloxacin and levofloxacin in patients with multidrug-resistant**  
 470 **tuberculosis (MDR-TB). Standard disease is defined as non-cavitary and regular disease on radiograph. Severe disease is**  
 471 **defined as cavitary or extensive disease on radiograph.**

| Fluoroquinolone | Pulmonary MDR-TB                | Target $AUC_{0-24}/MIC^a$ |                   |     | Target $AUC_{0-24}$<br>(mg*h/L) |
|-----------------|---------------------------------|---------------------------|-------------------|-----|---------------------------------|
|                 |                                 | MGIT                      | 7H10/11           | LJ  |                                 |
| Moxifloxacin    | Standard disease                | >100                      | >50               | >25 | >40                             |
|                 | Severe disease or comorbidities | >100                      | >50               | >25 | >60 <sup>b</sup>                |
| Levofloxacin    | Standard disease                | >150                      | >150 <sup>c</sup> | >75 | >150                            |
|                 | Severe disease or comorbidities | >150                      | >150 <sup>c</sup> | >75 | >200 <sup>b</sup>               |

472 <sup>a</sup> Minimum inhibitory concentration (MIC) varies depending on growth media; Mycobacteria Growth  
 473 Indicator Tubes (MGIT), Middlebrook 7H10/7H11, and Lowenstein Jensen (LJ) agar.

474 <sup>b</sup> Target  $AUC_{0-24}/MIC$  at site of cavity; therefore higher  $AUC_{0-24}$  is required.

475 <sup>c</sup> Levofloxacin critical concentration of 7H11 was extrapolated to 7H10.

476

1  
2  
3  
4  
5  
6  
7  
8  
9  
10  
11  
12  
13  
14  
15  
16  
17  
18  
19  
20  
21  
22  
23  
24  
25  
26  
27  
28  
29  
30  
31  
32  
33  
34  
35  
36  
37  
38  
39  
40  
41  
42  
43  
44  
45  
46  
47  
48  
49  
50  
51  
52  
53  
54  
55  
56  
57  
58  
59  
60

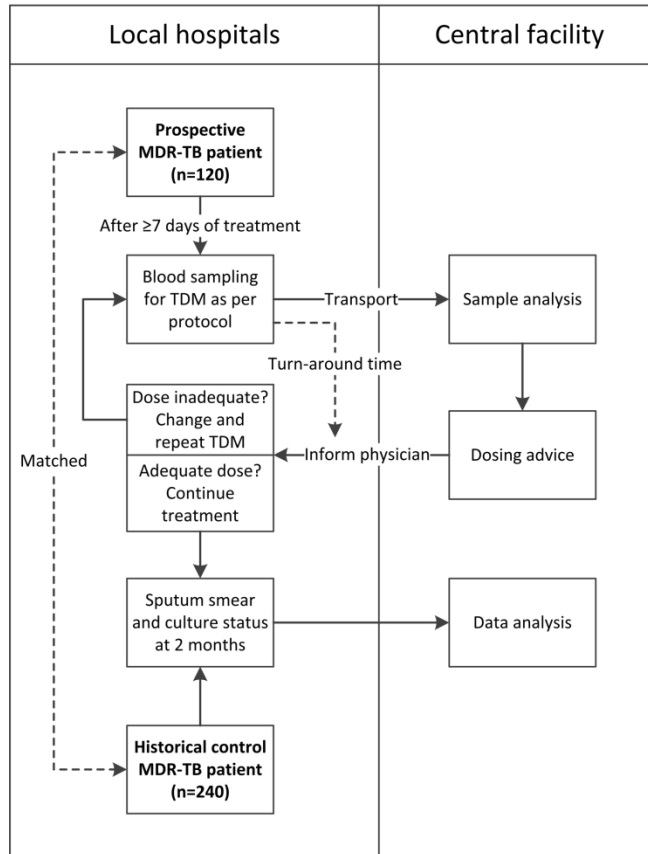

Figure 1. Workflow of study procedures in local hospitals and central laboratory facility.

70x130mm (600 x 600 DPI)

# BMJ Open

**Prospective Evaluation of improving Fluoroquinolone Exposure using Centralized Therapeutic Drug Monitoring (TDM) in patients with Tuberculosis (PERFECT) – a study protocol of a prospective multicentre cohort study.**

|                               |                                                                                                                                                                                                                                                                                                                                                                                                                                                                                                                                                                                                                                                                                                                                                                                                                                                                                                                                                                                                                                                                                                                                                                                                                                                                                                                                                                                                                                                                                                                                                                                                                                                                                                                                                                                                                                                                                                                                                                                                                                                                                                                                                                                                                           |
|-------------------------------|---------------------------------------------------------------------------------------------------------------------------------------------------------------------------------------------------------------------------------------------------------------------------------------------------------------------------------------------------------------------------------------------------------------------------------------------------------------------------------------------------------------------------------------------------------------------------------------------------------------------------------------------------------------------------------------------------------------------------------------------------------------------------------------------------------------------------------------------------------------------------------------------------------------------------------------------------------------------------------------------------------------------------------------------------------------------------------------------------------------------------------------------------------------------------------------------------------------------------------------------------------------------------------------------------------------------------------------------------------------------------------------------------------------------------------------------------------------------------------------------------------------------------------------------------------------------------------------------------------------------------------------------------------------------------------------------------------------------------------------------------------------------------------------------------------------------------------------------------------------------------------------------------------------------------------------------------------------------------------------------------------------------------------------------------------------------------------------------------------------------------------------------------------------------------------------------------------------------------|
| Journal:                      | <i>BMJ Open</i>                                                                                                                                                                                                                                                                                                                                                                                                                                                                                                                                                                                                                                                                                                                                                                                                                                                                                                                                                                                                                                                                                                                                                                                                                                                                                                                                                                                                                                                                                                                                                                                                                                                                                                                                                                                                                                                                                                                                                                                                                                                                                                                                                                                                           |
| Manuscript ID                 | bmjopen-2019-035350.R1                                                                                                                                                                                                                                                                                                                                                                                                                                                                                                                                                                                                                                                                                                                                                                                                                                                                                                                                                                                                                                                                                                                                                                                                                                                                                                                                                                                                                                                                                                                                                                                                                                                                                                                                                                                                                                                                                                                                                                                                                                                                                                                                                                                                    |
| Article Type:                 | Protocol                                                                                                                                                                                                                                                                                                                                                                                                                                                                                                                                                                                                                                                                                                                                                                                                                                                                                                                                                                                                                                                                                                                                                                                                                                                                                                                                                                                                                                                                                                                                                                                                                                                                                                                                                                                                                                                                                                                                                                                                                                                                                                                                                                                                                  |
| Date Submitted by the Author: | 06-Mar-2020                                                                                                                                                                                                                                                                                                                                                                                                                                                                                                                                                                                                                                                                                                                                                                                                                                                                                                                                                                                                                                                                                                                                                                                                                                                                                                                                                                                                                                                                                                                                                                                                                                                                                                                                                                                                                                                                                                                                                                                                                                                                                                                                                                                                               |
| Complete List of Authors:     | <p>van den Elsen, Simone; University of Groningen, University Medical Center Groningen, Clinical Pharmacy and Pharmacology<br/> Sturkenboom, Marieke; University of Groningen, University Medical Center Groningen, Clinical Pharmacy and Pharmacology<br/> Akkerman, Onno; University of Groningen, University Medical Center Groningen, Department of Pulmonary Diseases &amp; Tuberculosis;<br/> University of Groningen, University Medical Center Groningen, Tuberculosis Center Beatrixoord<br/> Barkane, Linda; Riga East University Hospital TB and Lung Disease Clinic, MDR-TB department<br/> Bruchfeld, Judith; Karolinska Institutet, Division of Infectious Diseases, Department of Medicine, Solna; Karolinska University Hospital, Department of Infectious Diseases<br/> Eather, Geoffrey; Princess Alexandra Hospital, Department of Respiratory Medicine &amp; Metro South Clinical Tuberculosis Service<br/> Heysell, Scott; University of Virginia, Division of Infectious Diseases and International Health<br/> Hurevich, Henadz; The Republican Scientific and Practical Center for Pulmonology and Tuberculosis<br/> Kuksa, Liga; Riga East University Hospital TB and Lung Disease Clinic, MDR-TB department<br/> Kunst, Heinke; Barts Health NHS Trust, Blizard Institute, Queen Mary University of London, Department of Respiratory Medicine<br/> Kuhlin, Johanna; Karolinska Institutet, Department of Medicine, Unit of Infectious Disease; Karolinska University Hospital, Department of Infectious Diseases<br/> Manika, Katerina; Aristotle University of Thessaloniki, G. Papanikolaou Hospital, Pulmonary Department, Respiratory Infections Unit<br/> Moschos, Charalampos; "Sotiria" Hospital for Chest Diseases, Drug-Resistant Tuberculosis Unit<br/> Mpagama, Stellah; Kibong'oto Infectious Diseases Hospital<br/> Muñoz Torrico, Marcela; Instituto Nacional de Enfermedades Respiratorias, Clínica de Tuberculosis<br/> Skrahina, Alena; The Republican Scientific and Practical Center for Pulmonology and Tuberculosis<br/> Sotgiu, Giovanni; University of Sassari, Clinical Epidemiology and Medical Statistics Unit, Department of Medical, Surgical and Experimental</p> |

|                                    |                                                                                                                                                                                                                                                                                                                                                                                                                                                                                                                                                                                                                                                                                                                                                                                                                                                                                                                                                                                                                                                                                                                                                                                                                                                                                                                                                                                                                                                       |
|------------------------------------|-------------------------------------------------------------------------------------------------------------------------------------------------------------------------------------------------------------------------------------------------------------------------------------------------------------------------------------------------------------------------------------------------------------------------------------------------------------------------------------------------------------------------------------------------------------------------------------------------------------------------------------------------------------------------------------------------------------------------------------------------------------------------------------------------------------------------------------------------------------------------------------------------------------------------------------------------------------------------------------------------------------------------------------------------------------------------------------------------------------------------------------------------------------------------------------------------------------------------------------------------------------------------------------------------------------------------------------------------------------------------------------------------------------------------------------------------------|
|                                    | <p>Sciences,<br/> Tadolini, Marina; Alma Mater Studiorum University of Bologna, Unit of Infectious Diseases, Department of Medical and Surgical Sciences<br/> Tiberi, Simon; Barts Health NHS Trust, Blizard Institute, Queen Mary University of London, Department of Infection<br/> Volpato, Francesca; Alma Mater Studiorum University of Bologna, Unit of Infectious Diseases, Department of Medical and Surgical Sciences<br/> van der Werf, Tjip S.; University Medical Center Groningen, Department of Pulmonary Diseases &amp; Tuberculosis; University of Groningen, University Medical Center Groningen, Department of Internal Medicine<br/> Wilson, Malcolm; Princess Alexandra Hospital, Department of Respiratory Medicine &amp; Metro South Clinical Tuberculosis Service<br/> Zúñiga , Joaquin; Instituto Nacional de Enfermedades Respiratorias, Laboratory of Immunobiology and Genetics; Escuela de Medicina y Ciencias de Salud, Tecnológico de Monterrey<br/> Touw, Daan; University of Groningen, University Medical Center Groningen, Clinical Pharmacy and Pharmacology<br/> Migliori, Giovanni; Istituti Clinici Scientifici Maugeri IRCCS, Servizio di Epidemiologia Clinica delle Malattie Respiratorie<br/> Alffenaar, Jan-Willem; University of Groningen, University Medical Center Groningen, Clinical Pharmacy and Pharmacology; The University of Sydney, Sydney Pharmacy School, Faculty of Medicine and Health</p> |
| <b>Primary Subject Heading</b> :   | Infectious diseases                                                                                                                                                                                                                                                                                                                                                                                                                                                                                                                                                                                                                                                                                                                                                                                                                                                                                                                                                                                                                                                                                                                                                                                                                                                                                                                                                                                                                                   |
| <b>Secondary Subject Heading</b> : | Pharmacology and therapeutics, Health services research                                                                                                                                                                                                                                                                                                                                                                                                                                                                                                                                                                                                                                                                                                                                                                                                                                                                                                                                                                                                                                                                                                                                                                                                                                                                                                                                                                                               |
| <b>Keywords</b> :                  | Tuberculosis < INFECTIOUS DISEASES, CLINICAL PHARMACOLOGY, Organisation of health services < HEALTH SERVICES ADMINISTRATION & MANAGEMENT, INFECTIOUS DISEASES                                                                                                                                                                                                                                                                                                                                                                                                                                                                                                                                                                                                                                                                                                                                                                                                                                                                                                                                                                                                                                                                                                                                                                                                                                                                                         |
|                                    |                                                                                                                                                                                                                                                                                                                                                                                                                                                                                                                                                                                                                                                                                                                                                                                                                                                                                                                                                                                                                                                                                                                                                                                                                                                                                                                                                                                                                                                       |

SCHOLARONE™  
Manuscripts



I, the Submitting Author has the right to grant and does grant on behalf of all authors of the Work (as defined in the below author licence), an exclusive licence and/or a non-exclusive licence for contributions from authors who are: i) UK Crown employees; ii) where BMJ has agreed a CC-BY licence shall apply, and/or iii) in accordance with the terms applicable for US Federal Government officers or employees acting as part of their official duties; on a worldwide, perpetual, irrevocable, royalty-free basis to BMJ Publishing Group Ltd ("BMJ") its licensees and where the relevant Journal is co-owned by BMJ to the co-owners of the Journal, to publish the Work in this journal and any other BMJ products and to exploit all rights, as set out in our [licence](#).

The Submitting Author accepts and understands that any supply made under these terms is made by BMJ to the Submitting Author unless you are acting as an employee on behalf of your employer or a postgraduate student of an affiliated institution which is paying any applicable article publishing charge ("APC") for Open Access articles. Where the Submitting Author wishes to make the Work available on an Open Access basis (and intends to pay the relevant APC), the terms of reuse of such Open Access shall be governed by a Creative Commons licence – details of these licences and which [Creative Commons](#) licence will apply to this Work are set out in our licence referred to above.

Other than as permitted in any relevant BMJ Author's Self Archiving Policies, I confirm this Work has not been accepted for publication elsewhere, is not being considered for publication elsewhere and does not duplicate material already published. I confirm all authors consent to publication of this Work and authorise the granting of this licence.

1  
2  
3 1 Prospective Evaluation of impROving Fluoroquinolone Exposure using Centralized Therapeutic Drug  
4  
5 2 Monitoring (TDM) in patients with Tuberculosis (PERFECT) – a study protocol of a prospective  
6  
7 3 multicentre cohort study.  
8  
9

10 4  
11  
12 5 Simone HJ van den Elsen<sup>a</sup>, Marieke GG Sturkenboom<sup>a</sup>, Onno W Akkerman<sup>b,c</sup>, Linda Barkane<sup>d</sup>, Judith  
13  
14 6 Bruchfeld<sup>e,f</sup>, Geoffrey Eather<sup>g</sup>, Scott K Heysell<sup>h</sup>, Henadz Hurevich<sup>i</sup>, Liga Kuksa<sup>d</sup>, Heinke Kunstj, Johanna  
15  
16 7 Kuhlin<sup>e,f</sup>, Katerina Manika<sup>k</sup>, Charalampos Moschos<sup>l</sup>, Stellah G Mpagama<sup>m</sup>, Marcela Muñoz-Torricon,  
17  
18 8 Alena Skrahina<sup>o</sup>, Giovanni Sotgiu<sup>p</sup>, Marina Tadolini<sup>q</sup>, Simon Tiberi<sup>r</sup>, Francesca Volpato<sup>q</sup>, Tjip S van der  
19  
20 9 Werf<sup>c,s</sup>, Malcolm R Wilson<sup>g</sup>, Joaquin Zuñiga<sup>t</sup>, Daan J Touw<sup>a</sup> #, Giovanni B Migliori<sup>u</sup> #, and Jan-Willem C  
21  
22 10 Alffenaar<sup>a,v</sup> #  
23  
24  
25  
26  
27

28 12 <sup>a</sup> University of Groningen, University Medical Center Groningen, Department of Clinical Pharmacy  
29  
30 13 and Pharmacology, Groningen, The Netherlands.

31  
32 14 <sup>b</sup> University of Groningen, University Medical Center Groningen, Tuberculosis Center Beatrixoord,  
33  
34 15 Haren, The Netherlands

35  
36 16 <sup>c</sup> University of Groningen, University Medical Center Groningen, Department of Pulmonary Diseases  
37  
38 17 & Tuberculosis, Groningen, The Netherlands.

39  
40 18 <sup>d</sup> MDR-TB department, Riga East University Hospital TB and Lung Disease Clinic, Riga, Latvia.

41  
42 19 <sup>e</sup> Division of Infectious Diseases, Department of Medicine, Solna, Karolinska Institutet, Stockholm,  
43  
44 20 Sweden.

45  
46 21 <sup>f</sup> Department of Infectious Diseases, Karolinska University Hospital, Stockholm, Sweden.

47  
48 22 <sup>g</sup> Department of Respiratory Medicine & Metro South Clinical Tuberculosis Service, Princess  
49  
50 23 Alexandra Hospital, Woolloongabba, Queensland, Australia.

51  
52 24 <sup>h</sup> Division of Infectious Diseases and International Health, University of Virginia, Charlottesville, VA,  
53  
54 25 USA.

55  
56 26 <sup>i</sup> The Republican Scientific and Practical Center for Pulmonology and Tuberculosis, Minsk, Belarus.  
57  
58  
59  
60

- 1  
2  
3 27 <sup>j</sup> Blizard Institute, Queen Mary University of London, Department of Respiratory Medicine, Barts  
4  
5 28 Health NHS Trust, London, United Kingdom.  
6  
7 29 <sup>k</sup> Pulmonary Department, Respiratory Infections Unit, Aristotle University of Thessaloniki, G.  
8  
9 30 Papanikolaou Hospital, Thessaloniki, Greece.  
10  
11  
12 31 <sup>l</sup> Drug-Resistant Tuberculosis Unit, "Sotiria" Hospital for Chest Diseases, Athens, Greece  
13  
14 32 <sup>m</sup> Kibong'oto Infectious Diseases Hospital, Kilimanjaro, Tanzania.  
15  
16 33 <sup>n</sup> Clínica de Tuberculosis, Instituto Nacional de Enfermedades Respiratorias, Mexico City, Mexico.  
17  
18 34 <sup>o</sup> The Republican Scientific and Practical Center for Pulmonology and Tuberculosis, Minsk, Belarus.  
19  
20 35 <sup>p</sup> Clinical Epidemiology and Medical Statistics Unit, Department of Medical, Surgical and Experimental  
21  
22 36 Sciences, University of Sassari, Sassari, Italy  
23  
24 37 <sup>q</sup> Unit of Infectious Diseases, Department of Medical and Surgical Sciences, Alma Mater Studiorum  
25  
26 38 University of Bologna, Bologna, Italy.  
27  
28 39 <sup>r</sup> Blizard Institute, Queen Mary University of London, Department of Infection, Barts Health NHS  
29  
30 40 Trust, London, United Kingdom  
31  
32 41 <sup>s</sup> University of Groningen, University Medical Center Groningen, Department of Internal Medicine,  
33  
34 42 Groningen, The Netherlands.  
35  
36 43 <sup>t</sup> Laboratory of Immunobiology and Genetics, Instituto Nacional de Enfermedades Respiratorias,  
37  
38 44 Mexico City, Mexico. Tecnologico de Monterrey, Escuela de Medicina y Ciencias de Salud, Mexico  
39  
40 45 City, Mexico.  
41  
42 46 <sup>u</sup> Servizio di Epidemiologia Clinica delle Malattie Respiratorie, Istituti Clinici Scientifici Maugeri IRCCS,  
43  
44 47 Tradate, Italy.  
45  
46 48 <sup>v</sup> Sydney Pharmacy School, Faculty of Medicine and Health, The University of Sydney, Sydney,  
47  
48 49 Australia  
49  
50  
51  
52  
53  
54  
55  
56  
57 51 # Authors contributed equally  
58  
59  
60



1  
2  
3  
4  
5  
6  
7  
8  
9  
10  
11  
12  
13  
14  
15  
16  
17  
18  
19  
20  
21  
22  
23  
24  
25  
26  
27  
28  
29  
30  
31  
32  
33  
34  
35  
36  
37  
38  
39  
40  
41  
42  
43  
44  
45  
46  
47  
48  
49  
50  
51  
52  
53  
54  
55  
56  
57  
58  
59  
60

53 Corresponding author: J.W.C. Alffenaar, University of Sydney, Faculty of Medicine and Health, School  
54 of Pharmacy, Pharmacy Building A15, NSW 2006, Australia. Email:  
55 [johannes.alfenaar@sydney.edu.au](mailto:johannes.alfenaar@sydney.edu.au); [j.w.c.alfenaar@umcg.nl](mailto:j.w.c.alfenaar@umcg.nl)

57 Word count: 2992

58

For peer review only

1  
2  
3 **59 Abstract**  
4

5 60 Introduction: Global multidrug-resistant tuberculosis (MDR-TB) treatment success rates remain  
6  
7 61 suboptimal. Highly active World Health Organization (WHO) Group A drugs moxifloxacin and  
8  
9 62 levofloxacin show intra- and inter-individual pharmacokinetic variability which can cause low drug  
10  
11 63 exposure. Therefore, therapeutic drug monitoring (TDM) of fluoroquinolones is recommended to  
12  
13 64 personalise the drug dosage, aiming to prevent development of drug resistance and optimize  
14  
15 65 treatment. However, TDM is considered laborious and expensive, and the clinical benefit in MDR-TB  
16  
17 66 has not been extensively studied. This observational multicentre study aims to determine the  
18  
19 67 feasibility of centralized TDM and to investigate the impact of fluoroquinolone TDM on sputum  
20  
21 68 conversion rates in patients with MDR-TB compared with historical controls.  
22  
23  
24  
25  
26  
27

28 70 Methods and analysis: Patients aged 18 years or older with sputum smear and culture positive  
29  
30 71 pulmonary MDR-TB will be eligible for inclusion. Patients receiving TDM using a limited sampling  
31  
32 72 strategy (t=0 and t=5 hours) will be matched to historical controls without TDM in a 1:2 ratio. Sample  
33  
34 73 analysis and dosing advice will be performed in a centralized laboratory. Centralized TDM will be  
35  
36 74 considered feasible if >80% of the dosing recommendations are returned within seven days after  
37  
38 75 sampling and 100% within fourteen days. The number of patients who are sputum smear and culture  
39  
40 76 negative after two months of treatment will be determined in the prospective TDM group and will be  
41  
42 77 compared to the control group without TDM to determine the impact of TDM.  
43  
44  
45  
46  
47

48 79 Ethics and dissemination: Ethical clearance was obtained by the ethical review committees of the ten  
49  
50 80 participating hospitals according to local procedures or is pending (supplementary file 1). Patients  
51  
52 81 will be included after written informed consent. We aim to publish the study results in a peer-  
53  
54 82 reviewed journal.  
55

56  
57 83  
58  
59 84 Trial registration: This study is registered at [clinicaltrials.gov](http://clinicaltrials.gov) (NCT03409315)  
60

85

**86 Strengths and limitations of this study**

- 87 • To our knowledge, this is the first study that investigates the impact of fluoroquinolone  
88 therapeutic drug monitoring (TDM) on sputum smear and culture conversion rates in  
89 prospective patients with multidrug-resistant tuberculosis (MDR-TB) versus historical  
90 controls without TDM.
- 91 • The feasibility for centralised TDM will be evaluated due to participation of multiple health  
92 care centres located in differently resourced countries from multiple regions in the world.
- 93 • The use of limited sampling strategies will reduce the burden of TDM for patients and health  
94 care providers while still providing a reliable estimation of drug exposure.
- 95 • A limitation is that this study focuses on TDM for moxifloxacin and levofloxacin only, being  
96 core drugs in MDR-TB treatment, without assessing other (core) anti-tuberculosis drugs.

97

98

## 99 Introduction

100 Tuberculosis (TB) is one of the major infectious diseases worldwide with an estimated number of  
101 10.0 million new cases in 2017.[1] In addition, multidrug-resistant TB (MDR-TB) remains a persistent  
102 problem with an estimated 458,000 new patients in 2017.[1] MDR-TB is treated from 9-20 months  
103 with a multidrug regimen.[2] The grouping of second-line anti-TB drugs was revised in 2018 by the  
104 World Health Organisation (WHO).[3] The fluoroquinolones, specifically moxifloxacin and  
105 levofloxacin, are now considered drugs of first choice (Group A drugs), together with bedaquiline and  
106 linezolid, in the treatment of MDR-TB.[2,3] The administration of Group A medicines to patients with  
107 MDR-TB has been associated with increased treatment success and reduced mortality rates in  
108 comparison with other second-line anti-TB drugs.[4] However, the estimated prevalence of  
109 fluoroquinolone-resistance among MDR-TB cases is on the rise from 14.5% in 2011 to 22% in  
110 2017.[5,6] Mismanagement of MDR-TB treatment, especially the shorter regimen, could amplify the  
111 risk of drug resistance even further.[7] Importantly, antibiotic resistance can be acquired due to  
112 noncompliance but also insufficient drug exposures (e.g. inter-individual pharmacokinetic variability  
113 in patients treated with fluoroquinolones).[8–11] Therapeutic drug monitoring (TDM) can help to  
114 prevent acquired resistance by individualising doses based on blood drug concentrations relative to  
115 the bacterial susceptibility, ideally measured as the minimal inhibitory concentration (MIC).[7,12]  
116 Several studies described the role played by low drug concentrations on treatment outcomes.[13–  
117 15] In the light of this evidence, it can be hypothesized that TDM, which aims for adequate dosing  
118 and exposure, could improve treatment outcomes. Yet, the added value of TDM in MDR-TB  
119 treatment outcomes has not been directly studied.[16,17] One retrospective study reported the  
120 effect of TDM on the treatment results of patients with drug-susceptible TB, either with and without  
121 diabetes.[18] In the group without diabetes, TDM had a significant beneficial effect with 73%  
122 sputum culture conversion at two months amongst patients receiving TDM versus 60% in the control  
123 group. The positive effect of TDM was even larger in patients with diabetes and TB. The isoniazid or  
124 rifampicin dose was adjusted in 12 out of 17 (71%) of the patients with diabetes based on peak

1  
2  
3 125 concentration ( $C_{max}$ ) targets. However, this data is not available for the group without diabetes. To  
4  
5 126 the best of our knowledge, such controlled studies have not yet been performed in people with  
6  
7 127 MDR-TB.  
8  
9  
10 128 The pharmacokinetic-pharmacodynamic parameter of fluoroquinolones is both time- and  
11  
12 129 concentration dependent and therefore uses the ratio of area under the concentration-time curve to  
13  
14 130 minimal inhibitory concentration ( $AUC_{0-24}/MIC$ ). The target value is  $AUC_{0-24}/MIC >146$  for levofloxacin  
15  
16 131 and free or unbound  $fAUC_{0-24}/MIC >53$  for moxifloxacin which corresponds to a total (bound and  
17  
18 132 unbound)  $AUC_{0-24}/MIC >106$  assuming a constant protein binding of 50%. [19,20] However, multiple  
19  
20 133 concentration measurements widely distributed over the dosing interval are required to compute  
21  
22 134 the area under the concentration-time curve from 0-24 h ( $AUC_{0-24}$ ). Limited sampling strategies (LSS)  
23  
24 135 could be adopted to reduce the burden of frequent sampling for both patient and personnel while  
25  
26 136 providing a reliable estimation of  $AUC_{0-24}$  using only two blood samples. [21,22]  
27  
28 137 Unfortunately, TDM is not always easily accessible in high TB burden areas because of practical and  
29  
30 138 financial reasons. Therefore, centralized TDM could be a valuable service. [23] Large laboratories are  
31  
32 139 generally well organised, have highly trained personnel with adequate performance of analytical  
33  
34 140 methods leading to reliable sample analysis results. [24] In addition, centralizing the TDM procedures  
35  
36 141 will engender more consistent practice from health care practitioners familiar with TDM and the  
37  
38 142 provision of dosing advice for anti-TB drugs.

39 143 The aim of the present study is, firstly, to investigate the feasibility of centralized TDM of  
40  
41 144 moxifloxacin and levofloxacin in the treatment of MDR-TB recruited in TB reference centres located  
42  
43 145 in different continents. Secondly, the impact of TDM on treatment results will be assessed by  
44  
45 146 comparing two month sputum smear and culture conversion rates among patients who received  
46  
47 147 TDM compared with matched historical controls without TDM.  
48  
49  
50  
51  
52  
53

54 148

## 55 149 **Methods and analysis**

56 150

1  
2  
3 151 Study design  
4

5 152 This observational, prospective, multicentre study aims to evaluate the feasibility of centralized TDM  
6  
7 153 of moxifloxacin and levofloxacin as well as the impact of TDM on two month sputum smear and  
8  
9 154 culture conversion rates of patients with MDR-TB. Study design and procedures are displayed in  
10  
11 155 Figure 1. The study was registered at clinicaltrials.gov (NCT03409315), recruitment started on 10  
12  
13 156 February 2018, and is expected to be completed in December 2020.  
14  
15

16 157

17  
18  
19 158 Study location  
20

21 159 University Medical Center Groningen (UMCG) in Groningen, The Netherlands is the coordinating  
22  
23 160 centre and serves as central laboratory facility for this study. The hospitals that are involved in  
24  
25 161 patient recruitment are displayed in Table 1.  
26

27 162

28  
29  
30 163 Study population  
31

32 164 Patients aged 18 years and older are eligible for inclusion if they are diagnosed with pulmonary MDR-  
33  
34 165 TB, have positive sputum smear and culture samples at time of inclusion, are treated with either oral  
35  
36 166 moxifloxacin or levofloxacin, and provide written informed consent. Pregnant or breast feeding  
37  
38 167 women will be excluded. The decision whether a patient is treated with either moxifloxacin or  
39  
40 168 levofloxacin is made by the clinician at the start of TB treatment based on local guidelines. Patients  
41  
42 169 will not be actively assigned to use moxifloxacin or levofloxacin since this is an observational study.  
43  
44 170 A total number of 120 patients (60 with moxifloxacin, 60 with levofloxacin) will be prospectively  
45  
46 171 included and compared with 240 matched historical controls (120 with moxifloxacin, 120 with  
47  
48 172 levofloxacin).  
49

50  
51  
52 173 The following data will be collected in both groups: sex, age, body weight, height, country of birth,  
53  
54 174 country of residence, comorbidities, corrected QT interval, laboratory values (kidney and liver  
55  
56 175 function, electrolytes), history of previous TB treatment, bacterial susceptibility (including MIC if  
57  
58 176 available), TB presentation (cavitary or non-cavitary), current MDR-TB regimen (including drug  
59  
60

1  
2  
3 177 dosages), sputum smear and culture data, treatment outcome (if known), and details on  
4  
5 178 fluoroquinolone use (duration, possible drug interactions or adverse events).  
6  
7  
8 179 Historical control patients will be matched on age, sex, *Mycobacterium tuberculosis* resistance  
9  
10 180 pattern of the isolate (only regimen core drugs), comorbidities (human immunodeficiency virus [HIV],  
11  
12 181 diabetes, immunosuppression), presence or absence of cavitary TB on chest radiography, and dosing  
13  
14 182 of the fluoroquinolone (mg/kg body weight,  $\pm 10\%$ ) to prospectively enrolled patients in a 2:1 ratio.  
15  
16  
17 183

#### 18 184 Interventions

20  
21 185 The objective of the feasibility of centralized TDM will be assessed by evaluating the process, by  
22  
23 186 which a locally collected sample will be analysed in a central laboratory and subsequent dosing  
24  
25 187 advice will be returned to the local physician. In brief, after at least seven days of treatment (steady  
26  
27  
28 188 state) two blood samples will be collected for TDM of moxifloxacin or levofloxacin according to a  
29  
30 189 previously developed LSS.[21,22] The first sample will be collected just before drug intake (t=0) and  
31  
32 190 the other at 5 hours after drug intake (t=5). Samples will be transported to the central laboratory for  
33  
34 191 drug analysis and will be accompanied by a form including key patient characteristics for  
35  
36 192 personalised dosing advice (i.e. sex, age, weight, height, serum creatinine, corrected QT (QTc)  
37  
38 193 interval, MIC, TB presentation, start of treatment, other anti-TB drugs, and comorbidities).  $AUC_{0-24}$   
39  
40 194 will be calculated using a population pharmacokinetic model [21,22] and Bayesian dose optimisation  
41  
42 195 in MWPharm++ (version 1.7.3; Mediware, Groningen, The Netherlands).  
43  
44  
45 196 Dosing is optimised based on  $AUC_{0-24}/MIC$  or  $AUC_{0-24}$  (in case MIC is unknown), taking into  
46  
47 197 consideration comorbidities (HIV, diabetes, and immunosuppression), persistence of TB symptoms,  
48  
49 198 and response to treatment so far. The Bayesian dosing software uses sex, age, height, weight, and  
50  
51 199 renal function in addition to drug dose and measured drug concentrations to forecast the drug  
52  
53 200 exposure after a dose change. For patients who are at risk for treatment failure due to the previously  
54  
55 201 mentioned reasons, a higher drug exposure is recommended. This is especially relevant in case of an  
56  
57 202 unknown individual MIC, since the actual MIC might be near the breakpoint, to prevent treatment  
58  
59  
60

1  
2  
3 203 failure and acquired resistance. The target  $AUC_{0-24}/MIC$  and  $AUC_{0-24}$  are shown in Table 1. If a dose  
4  
5 204 change is necessary, TDM is to be repeated after at least seven days after the initiation of the new  
6  
7 205 dose (steady state). Dose increases of moxifloxacin will not be advised in case of a prolonged QTc  
8  
9 206 interval ( $>450$  ms for males,  $>470$  ms for females), because of safety reasons. As levofloxacin may be  
10  
11 207 less cardiotoxic than moxifloxacin, levofloxacin dose increases are permitted in case of prolonged  
12  
13 208 QTc interval, but only with adequate electrocardiogram monitoring. Patients with prolonged QTc  
14  
15 209 interval will not be excluded from the study, since TDM can still be helpful to verify drug exposure. A  
16  
17 210 closely monitored follow-up including MIC determination can be advised in case of  $AUC_{0-24}$  of 25 to  
18  
19 211  $40 \text{ mg}^* \text{h/L}$  in combination with QTc interval prolongation. In case of very low moxifloxacin exposure  
20  
21 212 ( $AUC_{0-24} < 20 \text{ mg}^* \text{h/L}$ ) in combination with a prolonged QTc interval, the physician will be advised to  
22  
23 213 reconsider the anti-TB regimen as moxifloxacin may be less active than expected.  
24  
25  
26  
27  
28  
29

### 30 215 Laboratory methods

#### 31 216 Drug analysis:

32  
33 217 Measurement of moxifloxacin and levofloxacin plasma/serum concentrations will take place at the  
34  
35 218 laboratory of the department of Clinical Pharmacy and Pharmacology in the UMCG, The Netherlands,  
36  
37 219 and using validated liquid chromatography-mass spectrometry (LC-MS/MS) methods. The method for  
38  
39 220 levofloxacin has an accuracy of 0.1-12.7%, within-run precision of 1.4-2.4%, and between-run  
40  
41 221 precision of 3.6-4.1%. The calibration curve is linear over a range of 0.10 to 5.00 mg/L.[25] This range  
42  
43 222 was successfully expanded to 0.20 to 50.0 mg/L in a recent update of the method (data on file).  
44  
45 223 Accuracy of the moxifloxacin method is 2.7-7.1%, within-run precision 1.4-1.6%, and between-run  
46  
47 224 precision 1.0-1.6%. The calibration curve is linear over a range of 0.05 to 5.00 mg/L.[26] For both  
48  
49 225 fluoroquinolones only the total concentration (bound and unbound) will be measured. Therefore, the  
50  
51 226 target  $AUC_{0-24}/MIC$  values of  $>150$  [19] and  $>100$  [20] will be used for levofloxacin and moxifloxacin,  
52  
53 227 respectively (Table 2).  
54  
55  
56  
57  
58  
59  
60



1  
2  
3 228 Plasma and serum samples containing levofloxacin are stable for at least ten days at 50 °C and can  
4  
5 229 therefore be transported to the central facility in ambient temperature, without the need of  
6  
7 230 transport on dry ice.[27] The thermal stability of moxifloxacin was also tested according to the  
8  
9 231 method of Ghimire *et al* and showed that moxifloxacin serum and plasma samples are stable for at  
10  
11 232 least ten days at 50 °C as well (data on file).  
12  
13

233

234 Microbiology:

16 234 Microbiology:  
17  
18 235 The assessment of sputum smear and culture status after two months of MDR-TB treatment will be  
19  
20 236 performed according to the local procedures, but at least once a month until documented culture  
21  
22 237 conversion. MIC determination is preferred but not mandatory for TDM and will be performed  
23  
24 238 according to local procedures as well. To account for the differences in culture media used in drug  
25  
26 239 susceptibility testing, correction factors based on the critical concentrations in the WHO-document  
27  
28 240 “Technical Report on critical concentrations for drug susceptibility testing of medicines used in the  
29  
30 241 treatment of drug-resistant tuberculosis” will be applied.[28] The target  $AUC_{0-24}/MIC$  values for each  
31  
32 242 medium are shown in Table 2. Furthermore, second line molecular drug susceptibility tests will be  
33  
34 243 considered in case MIC data are not available.  
35  
36  
37  
38

244

245 Data analysis plan

39 244  
40  
41 245 Data analysis plan  
42  
43 246 The primary outcome to assess the feasibility of centralized TDM will be the turn-around time, which  
44  
45 247 is defined by the time between blood sampling and the peripheral centres receiving the TDM results  
46  
47 248 including the dosing advice. The procedure is considered feasible if >80% of the collected samples  
48  
49 249 will be reported back to the physician within seven days and 100% within two weeks. Additionally,  
50  
51 250 the feasibility will be evaluated using secondary outcomes of sample quality after shipping and  
52  
53 251 completeness of required information on the sample form.  
54  
55  
56 252 Furthermore, we will evaluate the role of TDM on MDR-TB treatment by comparing the percentages  
57  
58 253 of patients with sputum smear and culture conversion at two months in the enrolled groups. In  
59  
60

1  
2  
3 254 addition, we will evaluate the number of patients with low fluoroquinolone exposure requiring dose  
4  
5 255 changes after TDM to estimate the potential gains.  
6

7  
8 256

9  
10 257 Sample size calculation

11  
12 258 As the primary endpoint was of descriptive nature and no data were available to perform a well-  
13  
14 259 informed sample size calculation, it was decided to power the study on the clinical impact of TDM.  
15  
16 260 The primary assumption was based on the detection of a proportional difference in sputum smear  
17  
18 261 and culture positivity at two months of treatment in patients with MDR-TB undergoing TDM (35%)  
19  
20 262 [29] and control patients (60%)[30]. Given an alpha error of 0.05 and statistical power of 80%, we  
21  
22 263 calculated a sample size of 60 per single group is needed (i.e. 60 prospective and 120 historical  
23  
24 264 control patients for moxifloxacin and equally for levofloxacin).  
25  
26  
27  
28  
29

30 265

30 266 **Patient and public involvement**

31  
32 267 There has been no patient or public involvement in the design of this study.  
33  
34 268

35  
36 269

36 269 **Ethics and dissemination**

37  
38  
39 270 This study will be performed according to the Declaration of Helsinki and Good Clinical Practice.[31]  
40  
41 271 In each recruiting centre ethical clearance has been granted according to local regulations and  
42  
43 272 patient recruitment has begun at most sites (supplementary file 1) . Written informed consent will be  
44  
45 273 obtained from all patients undergoing TDM. The need of new informed consent for historical controls  
46  
47 274 was waived, because of the use of retrospective anonymous data collected for programmatic  
48  
49 275 purposes or previously reported data from studies for which patients had provided informed  
50  
51 276 consent.  
52  
53  
54 277 This study includes historical patients who did not receive TDM as controls instead of prospectively  
55  
56 278 randomising patients to either receive or not receive TDM for ethical reasons. The evidence that  
57  
58 279 TDM actually improves MDR-TB treatment outcomes has not been confirmed in randomised  
59  
60

1  
2  
3 280 controlled trials, but multiple studies have described treatment failure and risk of antibiotic  
4  
5 281 resistance due to sub therapeutic drug exposure of anti-TB drugs.[8,13,15,19,20] In combination with  
6  
7 282 a large between-patient pharmacokinetic variability [9,10], we hypothesize that TDM is able to  
8  
9 283 improve treatment outcomes by ensuring adequate exposure in individual patients. Moreover, TDM  
10  
11 284 for MDR-TB is recommended in guidelines when it is available.[2,32,33] We therefore considered it  
12  
13 285 unethical to withhold TDM.  
14  
15  
16 286 Study results will be published in a peer-reviewed journal and will be presented at an international  
17  
18 287 conference.  
19  
20  
21 288

## 23 289 **Discussion**

25 290 We present an observational prospective multicentre study which aims to: a) evaluate the feasibility  
26  
27 291 of centralized TDM in differently resourced settings of varying TB endemicity and geographic region  
28  
29 292 and b) evaluate the role of TDM of moxifloxacin or levofloxacin on sputum smear and culture  
30  
31 293 conversion rates in patients with MDR-TB after two months of treatment.  
32  
33

34 294 Presently, TDM is offered as an adjunctive to patients with TB in only a few hospitals worldwide and  
35  
36 295 is considered to be part of the excellent clinical care.[16,23,34–36] However, general interest in TDM  
37  
38 296 and MDR-TB treatment optimization has been increasing. A consensus statement on the diagnosis  
39  
40 297 and treatment of MDR-TB in Europe states that TDM for second-line drugs should be used if  
41  
42 298 available.[33] Moreover, the use of second-line anti-TB drugs was listed in the American Thoracic  
43  
44 299 Society (ATS) guidelines as indication for TDM and TDM is also recommended in the European Union  
45  
46 300 Standards for Tuberculosis Prevention and Care.[32,37] Yet, TDM is considered by some to be  
47  
48 301 laborious, expensive and thus unpractical in countries with high TB incidence. Similar injurious  
49  
50 302 arguments of economic rationing of services were applied to second-line drugs for the treatment  
51  
52 303 of MDR-TB in highly endemic settings and such rationing conversely led to amplification of the MDR-  
53  
54 304 TB epidemic.[38] This study will focus on the feasibility of centralized TDM, which could stimulate  
55  
56 305 performing TDM more often as it requires only one qualified laboratory with validated analytical  
57  
58  
59  
60

1  
2  
3 306 methods and devices in a central location. Other options to facilitate TDM are the implementation of  
4  
5 307 LSS, urine samples, dried-blood spots and saliva-screening methods.[34,39–41] This study will  
6  
7 308 additionally use LSS to increase feasibility as well as to reduce the burden of TDM. The LSS for  
8  
9 309 moxifloxacin and levofloxacin used in this study (0 and 5 h post-dose samples) were designed to  
10  
11 310 optimise AUC<sub>0-24</sub> [21,22], whereas the frequently used sampling schedule at 2 and 6 h post-dose is  
12  
13 311 more suitable to estimate C<sub>max</sub> and identify delayed absorption.[42]  
14  
15  
16 312 Although incorporating TDM in TB treatment has shown to give high treatment success rates in low  
17  
18 313 endemic countries, like the Netherlands [29], this has not yet been evaluated in well-designed  
19  
20 314 randomized controlled trials.[43] This study will provide a first-ever conclusion on the value of TDM  
21  
22 315 of moxifloxacin and levofloxacin on sputum smear and culture conversion of patients with MDR-TB.  
23  
24 316 It can be considered a limitation that only TDM of fluoroquinolones is performed in this study.  
25  
26 317 However, moxifloxacin and levofloxacin are currently among the core drugs in the MDR-treatment  
27  
28 318 regimen together with linezolid and bedaquiline.[3] Based on TDM criteria [44], we have selected  
29  
30 319 moxifloxacin and levofloxacin, because they show large inter-individual pharmacokinetic variability,  
31  
32 320 which emphasizes the need for personalized dosing.[9,10] Moreover, fluoroquinolone resistance is  
33  
34 321 on the rise and can develop during low drug exposure.[8] TDM of fluoroquinolones aims to find the  
35  
36 322 individual patients who have low drug exposure and would benefit from dose adjustment. Therefore,  
37  
38 323 it is expected that TDM of fluoroquinolones will have the largest impact on MDR-TB treatment  
39  
40 324 outcomes. We did not include TDM for linezolid and bedaquiline in this study, because of unclear  
41  
42 325 evidence for TDM of bedaquiline due to the novelty of the drug [45] and TDM of linezolid has  
43  
44 326 focussed more on preventing toxicity.[46–48]  
45  
46 327 Another limitation is that we are only evaluating interim outcomes such as sputum conversion rates  
47  
48 328 at two months and will not assess outcomes at the end of treatment. However, this study is primarily  
49  
50 329 designed to determine the feasibility of centralized TDM. In addition, this is the first study to  
51  
52 330 evaluate the impact of fluoroquinolone TDM. We believe that reporting the results on sputum  
53  
54 331 conversion rates is relevant as bacterial load and risk of acquired resistance are highest in the first  
55  
56  
57  
58  
59  
60

1  
2  
3 332 months of therapy. Fast sputum culture conversion reduces the risk of transmission of *M.*  
4  
5 333 *tuberculosis* strains which continues to sustain the MDR-TB epidemic.[49] With the results of this  
6  
7 334 study we aim to design a future study to extensively evaluate TDM of all drugs in the regimen  
8  
9 335 including the final treatment outcomes. However, such study would require substantial funding.  
10  
11 336 We hope that this study will show that centralized TDM is feasible and that TDM can improve the  
12  
13 337 quality of treatment in terms of faster sputum conversion rates compared to historical experience. If  
14  
15 338 that might be the case, the major hesitations about TDM in TB treatment can be attenuated  
16  
17 339 favouring the improvement of TB management using a personalized approach.[37]  
18  
19  
20  
21 340

22 340

23 341 **References**

- 24  
25 342 1 World Health Organization. Global tuberculosis report 2018. 2018.  
26  
27 343 2 World Health Organization. WHO consolidated guidelines on drug-resistant tuberculosis  
28  
29 344 treatment. 2019.  
30  
31 345 3 World Health Organization. Rapid Communication: Key changes to treatment of multidrug-  
32  
33 346 and rifampicin-resistant tuberculosis (MDR/RR-TB). 2018.  
34  
35 347 4 Ahmad N, Ahuja SD, Akkerman OW, *et al.* Treatment correlates of successful outcomes in  
36  
37 348 pulmonary multidrug-resistant tuberculosis: an individual patient data meta-analysis. *Lancet*  
38  
39 349 2018;**392**:821–34. doi:10.1016/S0140-6736(18)31644-1  
40  
41 350 5 Alffenaar J-WC, Migliori GB, Gumbo T. Multidrug-resistant tuberculosis: pharmacokinetic and  
42  
43 351 pharmacodynamic science. *Lancet Infect Dis* 2017;**17**:898. doi:10.1016/S1473-3099(17)30449-  
44  
45 352 8  
46  
47 353 6 World Health Organization. Global tuberculosis report 2012. 2012.  
48  
49 354 7 Davies Forsman L, Bruchfeld J, Alffenaar J-WC. Therapeutic drug monitoring to prevent  
50  
51 355 acquired drug resistance of fluoroquinolones in the treatment of tuberculosis. *Eur Respir J*  
52  
53 356 2017;**49**:1700173. doi:10.1183/13993003.00173-2017  
54  
55 357 8 Srivastava S, Pasipanodya JG, Meek C, *et al.* Multidrug-resistant tuberculosis not due to  
56  
57  
58  
59  
60

- 1  
2  
3 358 noncompliance but to between-patient pharmacokinetic variability. *J Infect Dis*  
4  
5 359 2011;**204**:1951–9. doi:10.1093/infdis/jir658  
6  
7 360 9 Van't Boveneind-Vrubleuskaya N, Seuruk T, van Hateren K, *et al.* Pharmacokinetics of  
8  
9 361 Levofloxacin in Multidrug- and Extensively Drug-Resistant Tuberculosis Patients. *Antimicrob*  
10 362 *Agents Chemother* 2017;**61**:e00343-17. doi:10.1128/AAC.00343-17  
11  
12 363 10 Pranger AD, van Altena R, Aarnoutse RE, *et al.* Evaluation of moxifloxacin for the treatment of  
13  
14 364 tuberculosis: 3 years of experience. *Eur Respir J* 2011;**38**:888–94.  
15  
16 365 doi:10.1183/09031936.00176610  
17  
18 366 11 Ghimire S, Van't Boveneind-Vrubleuskaya N, Akkerman OW, *et al.*  
19  
20 367 Pharmacokinetic/pharmacodynamic-based optimization of levofloxacin administration in the  
21  
22 368 treatment of MDR-TB. *J Antimicrob Chemother* 2016;**71**:2691–703. doi:10.1093/jac/dkw164  
23  
24 369 12 Alffenaar J-WC, Gumbo T, Aarnoutse RE. Acquired drug resistance: we can do more than we  
25  
26 370 think! *Clin Infect Dis* 2015;**60**:969–70. doi:10.1093/cid/ciu1146  
27  
28 371 13 Pasipanodya JG, McIlleron H, Burger A, *et al.* Serum drug concentrations predictive of  
29  
30 372 pulmonary tuberculosis outcomes. *J Infect Dis* 2013;**208**:1464–73. doi:10.1093/infdis/jit352  
31  
32 373 14 Modongo C, Pasipanodya JG, Magazi BT, *et al.* Artificial Intelligence and Amikacin Exposures  
33  
34 374 Predictive of Outcomes in Multidrug-Resistant Tuberculosis Patients. *Antimicrob Agents*  
35  
36 375 *Chemother* 2016;**60**:5928–32. doi:10.1128/AAC.00962-16  
37  
38 376 15 Sekaggya-Wiltshire C, von Braun A, Lamorde M, *et al.* Delayed Sputum Conversion in TB-HIV  
39  
40 377 Co-Infected Patients with Low Isoniazid and Rifampicin Concentrations. *Clin Infect Dis*  
41  
42 378 2018;**67**:708–16. doi:10.1093/cid/ciy179  
43  
44 379 16 Alffenaar J-WC, Tiberi S, Verbeeck RK, *et al.* Therapeutic Drug Monitoring in Tuberculosis:  
45  
46 380 Practical Application for Physicians. *Clin Infect Dis* 2017;**64**:104–5. doi:10.1093/cid/ciw677  
47  
48 381 17 Peloquin C. The Role of Therapeutic Drug Monitoring in Mycobacterial Infections. *Microbiol*  
49  
50 382 *Spectr* 2017;**5**:TNMI7-0029–2016. doi:10.1128/microbiolspec.TNMI7-0029-2016  
51  
52 383 18 Alkabab Y, Keller S, Dodge D, *et al.* Early interventions for diabetes related tuberculosis  
53  
54  
55  
56  
57  
58  
59  
60

- 1  
2  
3 384 associate with hastened sputum microbiological clearance in Virginia, USA. *BMC Infect Dis*  
4  
5 385 2017;**17**:125. doi:10.1186/s12879-017-2226-y  
6  
7 386 19 Deshpande D, Pasipanodya JG, Mpagama SG, *et al.* Levofloxacin  
8  
9 Pharmacokinetics/Pharmacodynamics, Dosing, Susceptibility Breakpoints, and Artificial  
10 387  
11 Intelligence in the Treatment of Multidrug-resistant Tuberculosis. *Clin Infect Dis*  
12 388  
13 2018;**67**:S293–302. doi:10.1093/cid/ciy611  
14 389  
15  
16 390 20 Gumbo T, Louie A, Deziel MR, *et al.* Selection of a moxifloxacin dose that suppresses drug  
17  
18 resistance in Mycobacterium tuberculosis, by use of an in vitro pharmacodynamic infection  
19 391  
20 model and mathematical modeling. *J Infect Dis* 2004;**190**:1642–51. doi:10.1086/424849  
21 392  
22  
23 393 21 van den Elsen SHJ, Sturkenboom MGG, Van't Boveneind-Vrubleuskaya N, *et al.* Population  
24  
25 Pharmacokinetic Model and Limited Sampling Strategies for Personalized Dosing of  
26 394  
27 Levofloxacin in Tuberculosis Patients. *Antimicrob Agents Chemother* 2018;**62**:e01092-18.  
28 395  
29 doi:10.1128/AAC.01092-18  
30 396  
31  
32 397 22 van den Elsen SHJ, Sturkenboom MGG, Akkerman OW, *et al.* Limited sampling strategies using  
33  
34 linear regression and the Bayesian approach for therapeutic drug monitoring of moxifloxacin  
35 398  
36 in tuberculosis patients. *Antimicrob Agents Chemother* 2019;**63**:e00384-19.  
37 399  
38 doi:10.1128/AAC.00384-19  
39 400  
40  
41 401 23 Ghimire S, Bolhuis MS, Sturkenboom MGG, *et al.* Incorporating therapeutic drug monitoring  
42  
43 into the World Health Organization hierarchy of tuberculosis diagnostics. *Eur Respir J*  
44 402  
45 2016;**47**:1867–9. doi:10.1183/13993003.00040-2016  
46 403  
47  
48 404 24 Schimke I. Quality and timeliness in medical laboratory testing. *Anal Bioanal Chem*  
49  
50 2009;**393**:1499–504. doi:10.1007/s00216-008-2349-5  
51 405  
52  
53 406 25 Ghimire S, van Hateren K, Vrubleuskaya N, *et al.* Determination of levofloxacin in human  
54  
55 serum using liquid chromatography tandem mass spectrometry. *J Appl Bioanal* 2018;**4**:16–25.  
56 407  
57 doi:10.17145/jab.18.004  
58 408  
59 409 26 Pranger AD, Alffenaar J-WC, Wessels AMA, *et al.* Determination of moxifloxacin in human  
60

- 1  
2  
3 410 plasma, plasma ultrafiltrate, and cerebrospinal fluid by a rapid and simple liquid  
4  
5 411 chromatography- tandem mass spectrometry method. *J Anal Toxicol* 2010;**34**:135–41.  
6  
7 412 27 Ghimire S, Jongedijk EM, van den Elsen SHJ, *et al*. Cross validation of liquid chromatography  
8  
9 413 tandem mass spectrometry method for quantification of levofloxacin in saliva. *Submitted*  
10  
11  
12 414 28 World Health Organization. Technical Report on critical concentrations for drug susceptibility  
13  
14 415 testing of medicines used in the treatment of drug-resistant tuberculosis. 2018.  
15  
16 416 29 van Altena R, de Vries G, Haar CH, *et al*. Highly successful treatment outcome of multidrug-  
17  
18 417 resistant tuberculosis in the Netherlands, 2000-2009. *Int J Tuberc Lung Dis* 2015;**19**:406–12.  
19  
20 418 doi:10.5588/ijtld.14.0838  
21  
22  
23 419 30 Sotgiu G, Centis R, D’Ambrosio L, *et al*. Efficacy, safety and tolerability of linezolid containing  
24  
25 420 regimens in treating MDR-TB and XDR-TB: systematic review and meta-analysis. *Eur Respir J*  
26  
27 421 2012;**40**:1430–42. doi:10.1183/09031936.00022912  
28  
29  
30 422 31 World Medical Association Declaration of Helsinki: ethical principles for medical research  
31  
32 423 involving human subjects. *JAMA* 2013;**310**:2191–4. doi:10.1001/jama.2013.281053  
33  
34 424 32 Nahid P, Dorman SE, Alipanah N, *et al*. Official American Thoracic Society/Centers for Disease  
35  
36 425 Control and Prevention/Infectious Diseases Society of America Clinical Practice Guidelines:  
37  
38 426 Treatment of Drug-Susceptible Tuberculosis. *Clin Infect Dis* 2016;**63**:147–95.  
39  
40 427 doi:10.1093/cid/ciw376  
41  
42  
43 428 33 Lange C, Abubakar I, Alffenaar J-WC, *et al*. Management of patients with multidrug-  
44  
45 429 resistant/extensively drug-resistant tuberculosis in Europe: a TBNET consensus statement. *Eur*  
46  
47 430 *Respir J* 2014;**44**:23–63. doi:10.1183/09031936.00188313  
48  
49  
50 431 34 Alffenaar J-WC, Heysell SK, Mpagama SG. Therapeutic Drug Monitoring: The Need for  
51  
52 432 Practical Guidance. *Clin Infect Dis* 2019;**68**:1065–6. doi:10.1093/cid/ciy787  
53  
54 433 35 Lange C, Dheda K, Chesov D, *et al*. Management of drug-resistant tuberculosis. *Lancet*  
55  
56 434 2019;**394**:953–66. doi:10.1016/S0140-6736(19)31882-3  
57  
58  
59 435 36 Alffenaar J-WC, Gumbo T, Dooley KE, *et al*. Integrating pharmacokinetics and  
60



- 1  
2  
3 436 pharmacodynamics in operational research to End TB. *Clin Infect Dis* 2019;:ciz942.  
4  
5 437 doi:10.1093/cid/ciz942  
6  
7 438 37 Migliori GB, Sotgiu G, Rosales-Klitz S, *et al.* ERS/ECDC Statement: European Union standards  
8  
9 for tuberculosis care, 2017 update. *Eur Respir J* 2018;**51**:1702678.  
10 439  
11 doi:10.1183/13993003.02678-2017  
12 440  
13  
14 441 38 Nicholson T, Admay C, Shakow A, *et al.* Double Standards in Global Health: Medicine, Human  
15  
16 442 Rights Law and Multidrug-Resistant TB Treatment Policy. *Health Hum Rights* 2016;**18**:85–102.  
17  
18  
19 443 39 Ghimire S, Maharjan B, Jongedijk EM, *et al.* Evaluation of Saliva as a Potential Alternative  
20  
21 444 Sampling Matrix for Therapeutic Drug Monitoring of Levofloxacin in Patients with Multidrug-  
22  
23 445 Resistant Tuberculosis. *Antimicrob Agents Chemother* 2019;**63**:e02379-18.  
24  
25 446 doi:10.1128/AAC.02379-18  
26  
27  
28 447 40 Zuur MA, Bolhuis MS, Anthony R, *et al.* Current status and opportunities for therapeutic drug  
29  
30 448 monitoring in the treatment of tuberculosis. *Expert Opin Drug Metab Toxicol* 2016;**12**:509–21.  
31  
32 449 doi:10.1517/17425255.2016.1162785  
33  
34  
35 450 41 Zentner I, Modongo C, Zetola NM, *et al.* Urine colorimetry for therapeutic drug monitoring of  
36  
37 451 pyrazinamide during tuberculosis treatment. *Int J Infect Dis* 2018;**68**:18–23.  
38  
39 452 doi:10.1016/j.ijid.2017.12.017  
40  
41  
42 453 42 Lange C, Aarnoutse RE, Alffenaar JWC, *et al.* Management of patients with multidrug-resistant  
43  
44 454 tuberculosis. *Int J Tuberc Lung Dis* 2019;**23**:645–62. doi:10.5588/ijtld.18.0622  
45  
46 455 43 van der Burgt EPM, Sturkenboom MGG, Bolhuis MS, *et al.* End TB with precision treatment!  
47  
48 456 *Eur Respir J* 2016;**47**:680 LP – 682. doi:10.1183/13993003.01285-2015  
49  
50 457 44 Figueras A. WHO report ‘Review of the evidence to include TDM in the Essential in vitro  
51  
52 458 Diagnostics List and prioritization of medicines to be monitored’. 2019.  
53  
54  
55 459 45 Borisov SE, Dheda K, Enwerem M, *et al.* Effectiveness and safety of bedaquiline-containing  
56  
57 460 regimens in the treatment of MDR- and XDR-TB: a multicentre study. *Eur Respir J*  
58  
59 461 2017;**49**:1700387. doi:10.1183/13993003.00387-2017  
60

- 1  
2  
3 462 46 Bolhuis MS, Tiberi S, Sotgiu G, *et al.* Is there still room for therapeutic drug monitoring of  
4  
5 463 linezolid in patients with tuberculosis? *Eur Respir J* 2016;**47**:1288 LP – 1290.  
6  
7 464 doi:10.1183/13993003.02185-2015  
8  
9  
10 465 47 Alffenaar J-WC, van Altena R, Harmelink IM, *et al.* Comparison of the pharmacokinetics of two  
11  
12 466 dosage regimens of linezolid in multidrug-resistant and extensively drug-resistant tuberculosis  
13  
14 467 patients. *Clin Pharmacokinet* 2010;**49**:559–65. doi:10.2165/11532080-000000000-00000  
15  
16 468 48 Bolhuis MS, Akkerman OW, Sturkenboom MGG, *et al.* Linezolid-based Regimens for  
17  
18 469 Multidrug-resistant Tuberculosis (TB): A Systematic Review to Establish or Revise the Current  
19  
20 470 Recommended Dose for TB Treatment. *Clin Infect Dis* 2018;**67**:S327–35.  
21  
22 471 doi:10.1093/cid/ciy625  
23  
24  
25 472 49 Migliori GB, Nardell E, Yedilbayev A, *et al.* Reducing tuberculosis transmission: a consensus  
26  
27 473 document from the World Health Organization Regional Office for Europe. *Eur Respir J*  
28  
29 474 2019;**53**:1900391. doi:10.1183/13993003.00391-2019  
30  
31  
32 475

33  
34 476 Acknowledgements:

35  
36 477 The project is part of the scientific activities of the Global Tuberculosis Network (GTN; Committees  
37  
38 478 on pharmacology- chair Jan-Willem C Alffenaar; Treatment- chair Marcela Muñoz-Torrico and Global  
39  
40 479 TB Consilium- chairs M. Tadolini and S. Tiberi) and of the WHO Collaborating Centre for Tuberculosis  
41  
42 480 and Lung Diseases, Tradate, ITA-80, 2017-2020- GBM/RC/LDA.  
43  
44  
45

46 481

47  
48 482 Author contributions:

49  
50 483 SE, MS, DT, GB, JWA designed the major outlines of the study. OA, LB, JB, GE, SH, HH, LK, HK, JK, KM,  
51  
52 484 CM, SM, MM, AS, GS, MT, ST, FV, TW, MW, JZ contributed to the study design. OA, LB, JB, GE, SH, HH,  
53  
54 485 LK, HK, JK, KM, CM, SM, MM, AS, MT, ST, FV, TW, MW, JZ will include patients in the study. GS  
55  
56 486 performed the sample size calculation. SE wrote the first draft of the manuscript together with MS,  
57  
58 487 DT, JWA. All authors read and approved the final version of the manuscript.  
59  
60

1  
2  
3  
4  
5  
6  
7  
8  
9  
10  
11  
12  
13  
14  
15  
16  
17  
18  
19  
20  
21  
22  
23  
24  
25  
26  
27  
28  
29  
30  
31  
32  
33  
34  
35  
36  
37  
38  
39  
40  
41  
42  
43  
44  
45  
46  
47  
48  
49  
50  
51  
52  
53  
54  
55  
56  
57  
58  
59  
60

488

489 Funding statement: This research received no specific grant from any funding agency in the public,  
490 commercial or not-for-profit sectors.

491

492 Competing interests: none declared

493

For peer review only

1  
2  
3 494 **Figure 1. Workflow of study procedures in local hospitals and central laboratory facility.**

4  
5  
6 495

7  
8 496

9  
10 497 **Table 1. List of participating hospitals and their location**

| Hospital                                                                    | Location                   |
|-----------------------------------------------------------------------------|----------------------------|
| University Medical Center Groningen (central lab facility)                  | Groningen, The Netherlands |
| Tuberculosis Clinic "Beatrixoord", UMCG                                     | Haren, The Netherlands     |
| Princess Alexandra Hospital                                                 | Brisbane, Australia        |
| Karolinska University Hospital                                              | Stockholm, Sweden          |
| Instituto Nacional de Enfermedades Respiratorias                            | Mexico City, Mexico        |
| Athens Chest Hospital "Sotiria"                                             | Athens, Greece             |
| Kibong'oto Infectious Diseases Hospital                                     | Kilimanjaro, Tanzania      |
| Republican Scientific and Practical Centre for Pulmonology and Tuberculosis | Minsk, Belarus             |
| Barts Health NHS trust                                                      | London, United Kingdom     |
| St. Orsola-Malpighi Hospital, University of Bologna                         | Bologna, Italy             |
| Riga East University Hospital TB and Lung Disease Clinic                    | Riga, Latvia               |

11  
12  
13  
14  
15  
16  
17  
18  
19  
20  
21  
22  
23  
24  
25  
26  
27  
28  
29  
30  
31  
32  
33  
34  
35  
36  
37  
38  
39  
40  
41  
42 498

43  
44 499  
45  
46  
47  
48  
49  
50  
51  
52  
53  
54  
55  
56  
57  
58  
59  
60

1  
2  
3 500 **Table 2. Target AUC<sub>0-24</sub>/MIC and AUC<sub>0-24</sub> for TDM of moxifloxacin and levofloxacin in patients with multidrug-resistant**  
4 **tuberculosis (MDR-TB). Standard disease is defined as non-cavitary and regular disease on radiograph. Severe disease is**  
5 **501 defined as cavitary or extensive disease on radiograph.**  
6  
7  
8

9  
10  
11  
12  
13  
14  
15  
16  
17  
18  
19  
20  
21  
22  
23  
24  
25  
26  
27  
28  
29

| Fluoroquinolone | Pulmonary MDR-TB                | Target AUC <sub>0-24</sub> /MIC <sup>a</sup> |                   |     | Target AUC <sub>0-24</sub><br>(mg*h/L) |
|-----------------|---------------------------------|----------------------------------------------|-------------------|-----|----------------------------------------|
|                 |                                 | MGIT                                         | 7H10/11           | LJ  |                                        |
| Moxifloxacin    | Standard disease                | >100                                         | >50               | >25 | >40                                    |
|                 | Severe disease or comorbidities | >100                                         | >50               | >25 | >60 <sup>b</sup>                       |
| Levofloxacin    | Standard disease                | >150                                         | >150 <sup>c</sup> | >75 | >150                                   |
|                 | Severe disease or comorbidities | >150                                         | >150 <sup>c</sup> | >75 | >200 <sup>b</sup>                      |

30 503 <sup>a</sup> Minimum inhibitory concentration (MIC) varies depending on growth media; Mycobacteria Growth  
31  
32 504 Indicator Tubes (MGIT), Middlebrook 7H10/7H11, and Lowenstein Jensen (LJ) agar.

33  
34 505 <sup>b</sup> Target AUC<sub>0-24</sub>/MIC at site of cavity; therefore higher AUC<sub>0-24</sub> is required.

35  
36 506 <sup>c</sup> Levofloxacin critical concentration of 7H11 was extrapolated to 7H10.  
37  
38  
39  
40 507  
41  
42 508  
43  
44  
45  
46  
47  
48  
49  
50  
51  
52  
53  
54  
55  
56  
57  
58  
59  
60

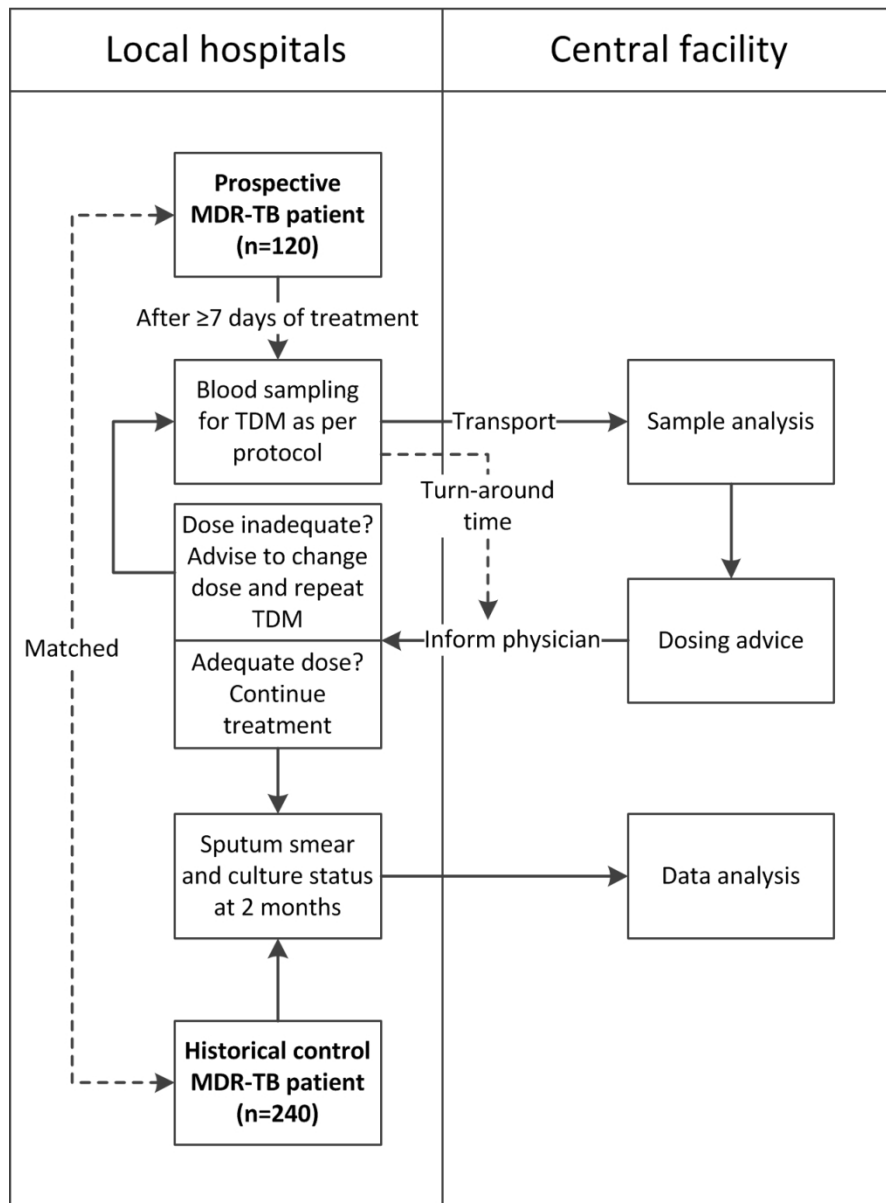

Workflow of study procedures in local hospitals and central laboratory facility.

107x145mm (300 x 300 DPI)

## Supplementary file 1

| Hospital                                                                    | Ethical review committee                                                        | Reference number        |
|-----------------------------------------------------------------------------|---------------------------------------------------------------------------------|-------------------------|
| University Medical Center Groningen (central lab facility)                  | Medical Ethics Review Board of University Medical Center Groningen              | 2018/029                |
| Tuberculosis Clinic "Beatrixoord", University Medical Center Groningen      | Medical Ethics Review Board of University Medical Center Groningen              | 2018/029                |
| Princess Alexandra Hospital                                                 | Metro South Human Research Ethics Committee                                     | HREC/18/QPAH/218        |
| Karolinska University Hospital                                              | Regional ERB Stockholm                                                          | 2018/1115-31/2          |
| Instituto Nacional de Enfermedades Respiratorias                            | Medical Ethics Review Board of Instituto Nacional de Enfermedades Respiratorias | C24-18                  |
| Athens Chest Hospital "Sotiria"                                             | Medical Ethics Review Board of Athens Chest Hospital                            | 6000421/14-03-2018      |
| Kibong'oto Infectious Diseases Hospital                                     | National Institute for Medical Research                                         | NIMR/HQ/R.8c/Vol.11/706 |
| Republican Scientific and Practical Centre for Pulmonology and Tuberculosis | Ethics pending                                                                  | Ethics pending          |
| Barts Health NHS trust                                                      | Ethics pending                                                                  | Ethics pending          |
| St. Orsola-Malpighi Hospital, University of Bologna                         | Ethics pending                                                                  | Ethics pending          |
| Riga East University Hospital TB and Lung Disease Clinic                    | The Research Ethics Committee of Rīga Stradiņš University                       | 68/22.02.2018           |
