# Supplementary material for: Prospective evaluation of improving fluoroquinolone exposure using centralised therapeutic drug monitoring (TDM) in patients with tuberculosis (PERFECT): a study protocol of a prospective multicentre cohort study
Source: PubMed Central journal article supplement — BMJ Open. 2020 Jun 16;10(6):e035350. doi: 10.1136/bmjopen-2019-035350 (PMC7304807; doi:10.1136/bmjopen-2019-035350), 2020-06-16
Supplement: bmjopen-2019-035350supp001.pdf [file bmjopen-2019-035350supp001.pdf]

## Supplementary file 1

| Hospital                                                                    | Ethical review committee                                                        | Reference number        |
|-----------------------------------------------------------------------------|---------------------------------------------------------------------------------|-------------------------|
| University Medical Center Groningen (central lab facility)                  | Medical Ethics Review Board of University Medical Center Groningen              | 2018/029                |
| Tuberculosis Clinic "Beatrixoord", University Medical Center Groningen      | Medical Ethics Review Board of University Medical Center Groningen              | 2018/029                |
| Princess Alexandra Hospital                                                 | Metro South Human Research Ethics Committee                                     | HREC/18/QPAH/218        |
| Karolinska University Hospital                                              | Regional ERB Stockholm                                                          | 2018/1115-31/2          |
| Instituto Nacional de Enfermedades Respiratorias                            | Medical Ethics Review Board of Instituto Nacional de Enfermedades Respiratorias | C24-18                  |
| Athens Chest Hospital "Sotiria"                                             | Medical Ethics Review Board of Athens Chest Hospital                            | 6000421/14-03-2018      |
| Kibong'oto Infectious Diseases Hospital                                     | National Institute for Medical Research                                         | NIMR/HQ/R.8c/Vol.11/706 |
| Republican Scientific and Practical Centre for Pulmonology and Tuberculosis | Ethics pending                                                                  | Ethics pending          |
| Barts Health NHS trust                                                      | Ethics pending                                                                  | Ethics pending          |
| St. Orsola-Malpighi Hospital, University of Bologna                         | Ethics pending                                                                  | Ethics pending          |
| Riga East University Hospital TB and Lung Disease Clinic                    | The Research Ethics Committee of Rīga Stradiņš University                       | 68/22.02.2018           |
